# Supplementary material for: Unveiling the functional components and anti-Alzheimer's activity of Koelreuteria elegans (Seem.) A.C. Sm. using UHPLC-MS/MS and molecular networking
Source: Royal Society of Chemistry journal article supplement (doi:10.1039/d4ma00007b), 2024-01-01
Supplement: d4ma00007b1.pdf [file d4ma00007b1.pdf]

## **Unveiling the functional components and anti-Alzheimer's activity of *Koelreuteria elegans* (Seem.) A.C. Sm. using UHPLC-MS/MS and molecular networking**

**Mohamed S. Demerdash<sup>1a</sup>, Reem T. Attia<sup>2a</sup>, Moshera M. El-Sherei<sup>1</sup>, Wafaa M. Aziz<sup>1</sup>, Sherif Ashraf Fahmy<sup>3\*</sup>, Marwa Y. Issa<sup>1\*</sup>**

<sup>1</sup>Department of Pharmacognosy, Faculty of Pharmacy, Cairo University, Cairo 11562, Egypt

<sup>2</sup>Department of Pharmacology, Toxicology, and Biochemistry, Faculty of Pharmacy, Future University in Egypt, Cairo11865, Egypt

<sup>3</sup>Department of Chemistry, School of Life and Medical Sciences, University of Hertfordshire Hosted by Global Academic Foundation, R5 New Garden City, New Administrative Capital, AL109AB, Cairo11835, Egypt

<sup>a</sup> **Both authors contributed equally to this work.**

**\*Corresponding authors: Sherif Ashraf Fahmy, Email: [sheriffahmy@aucegypt.edu](mailto:sheriffahmy@aucegypt.edu).**

**Marwa Y. Issa, Email: [marwa.issa@pharma.cu.edu.eg](mailto:marwa.issa@pharma.cu.edu.eg)**

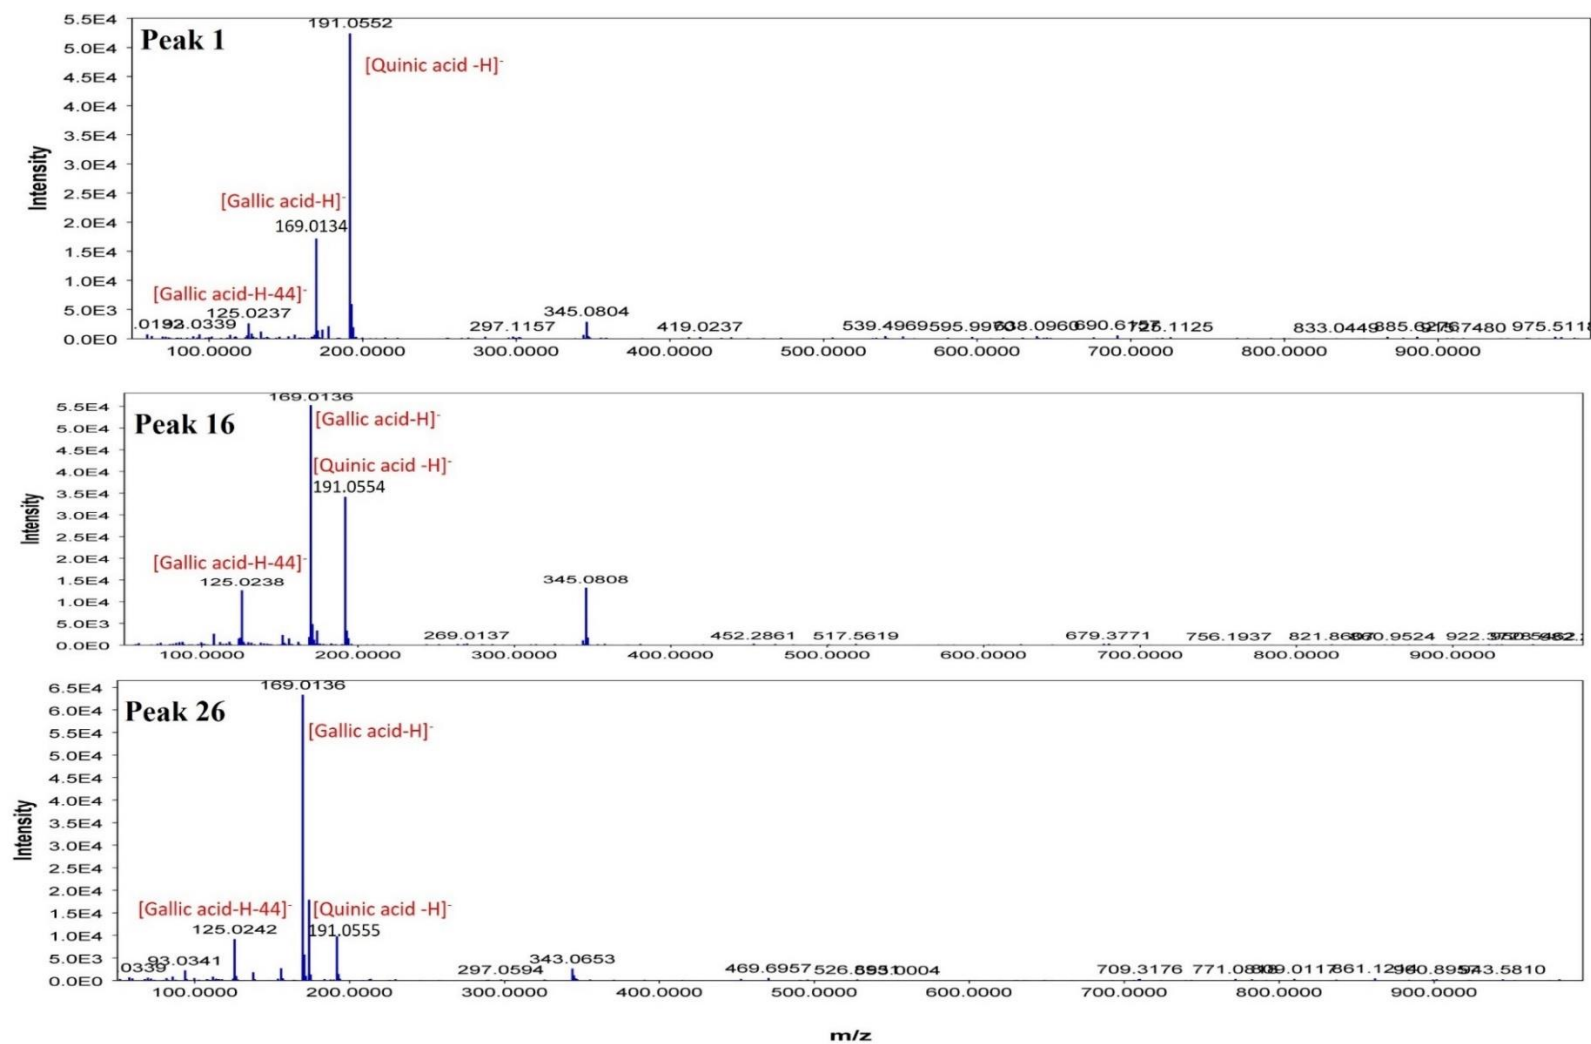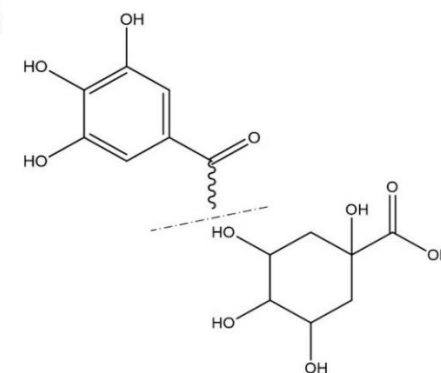

**Fig. S1.** MS/MS spectra of theogallin isomers (1, 16, 26)

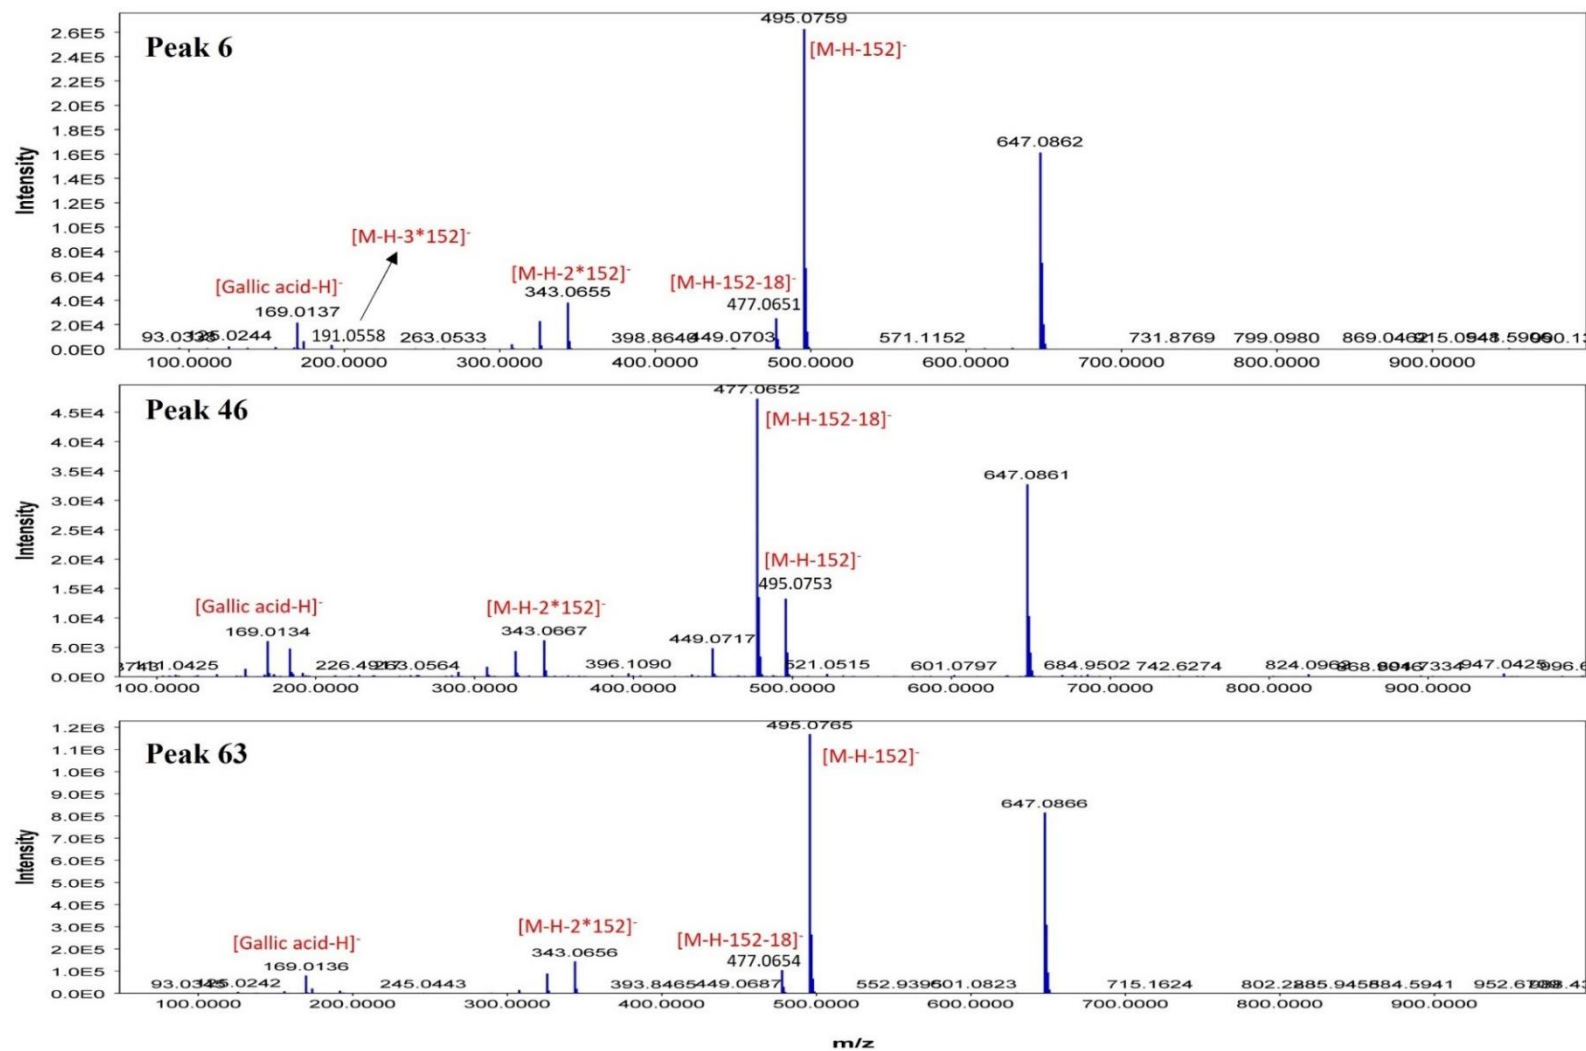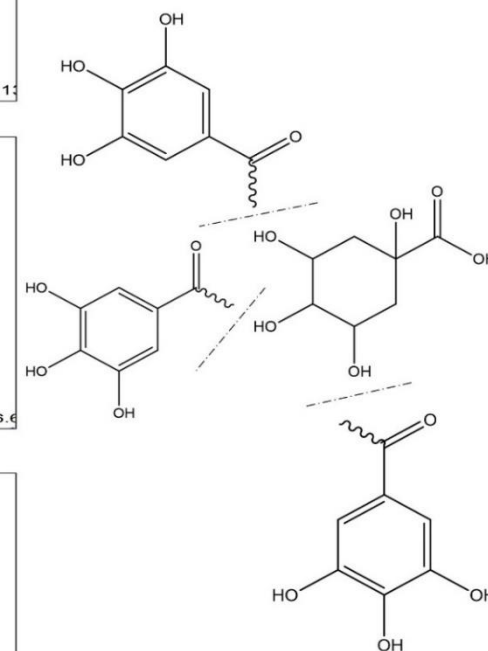

**Fig. S2.** MS/MS spectra of tri-O-galloylquinic isomers (6, 46, 63)

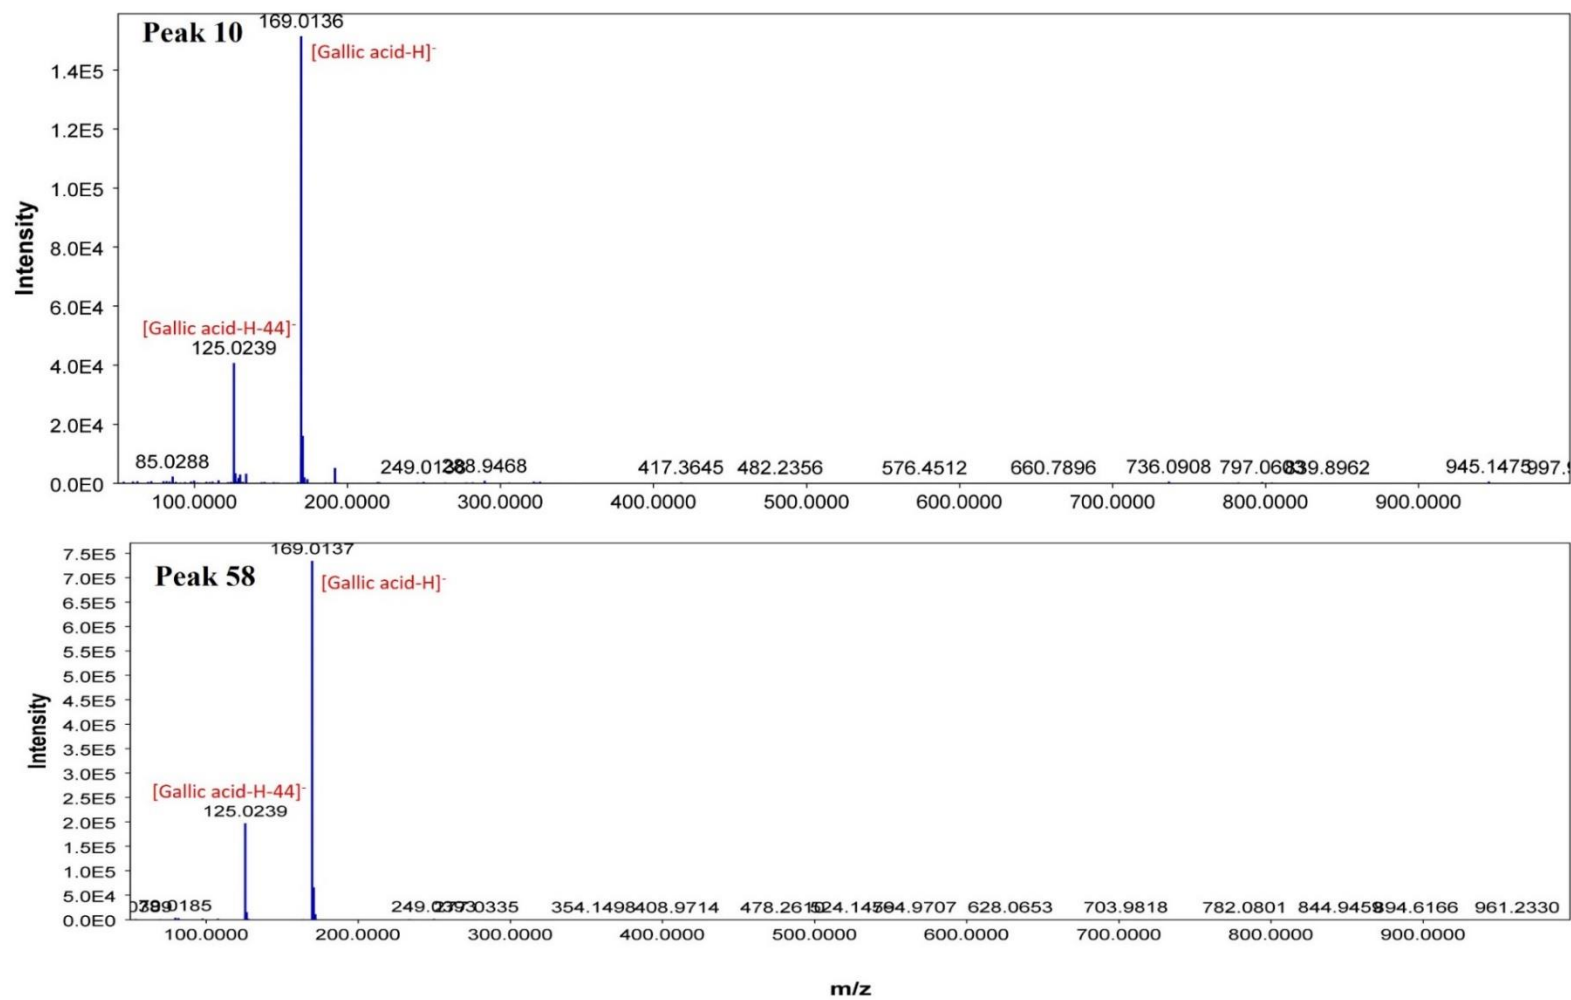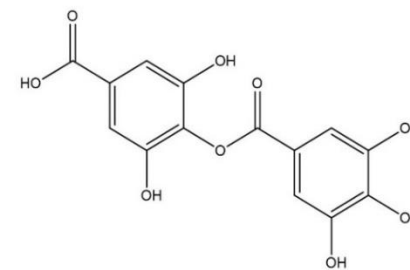

**Fig. S3.** MS/MS spectra of digallic acid isomers (**10**, **58**)

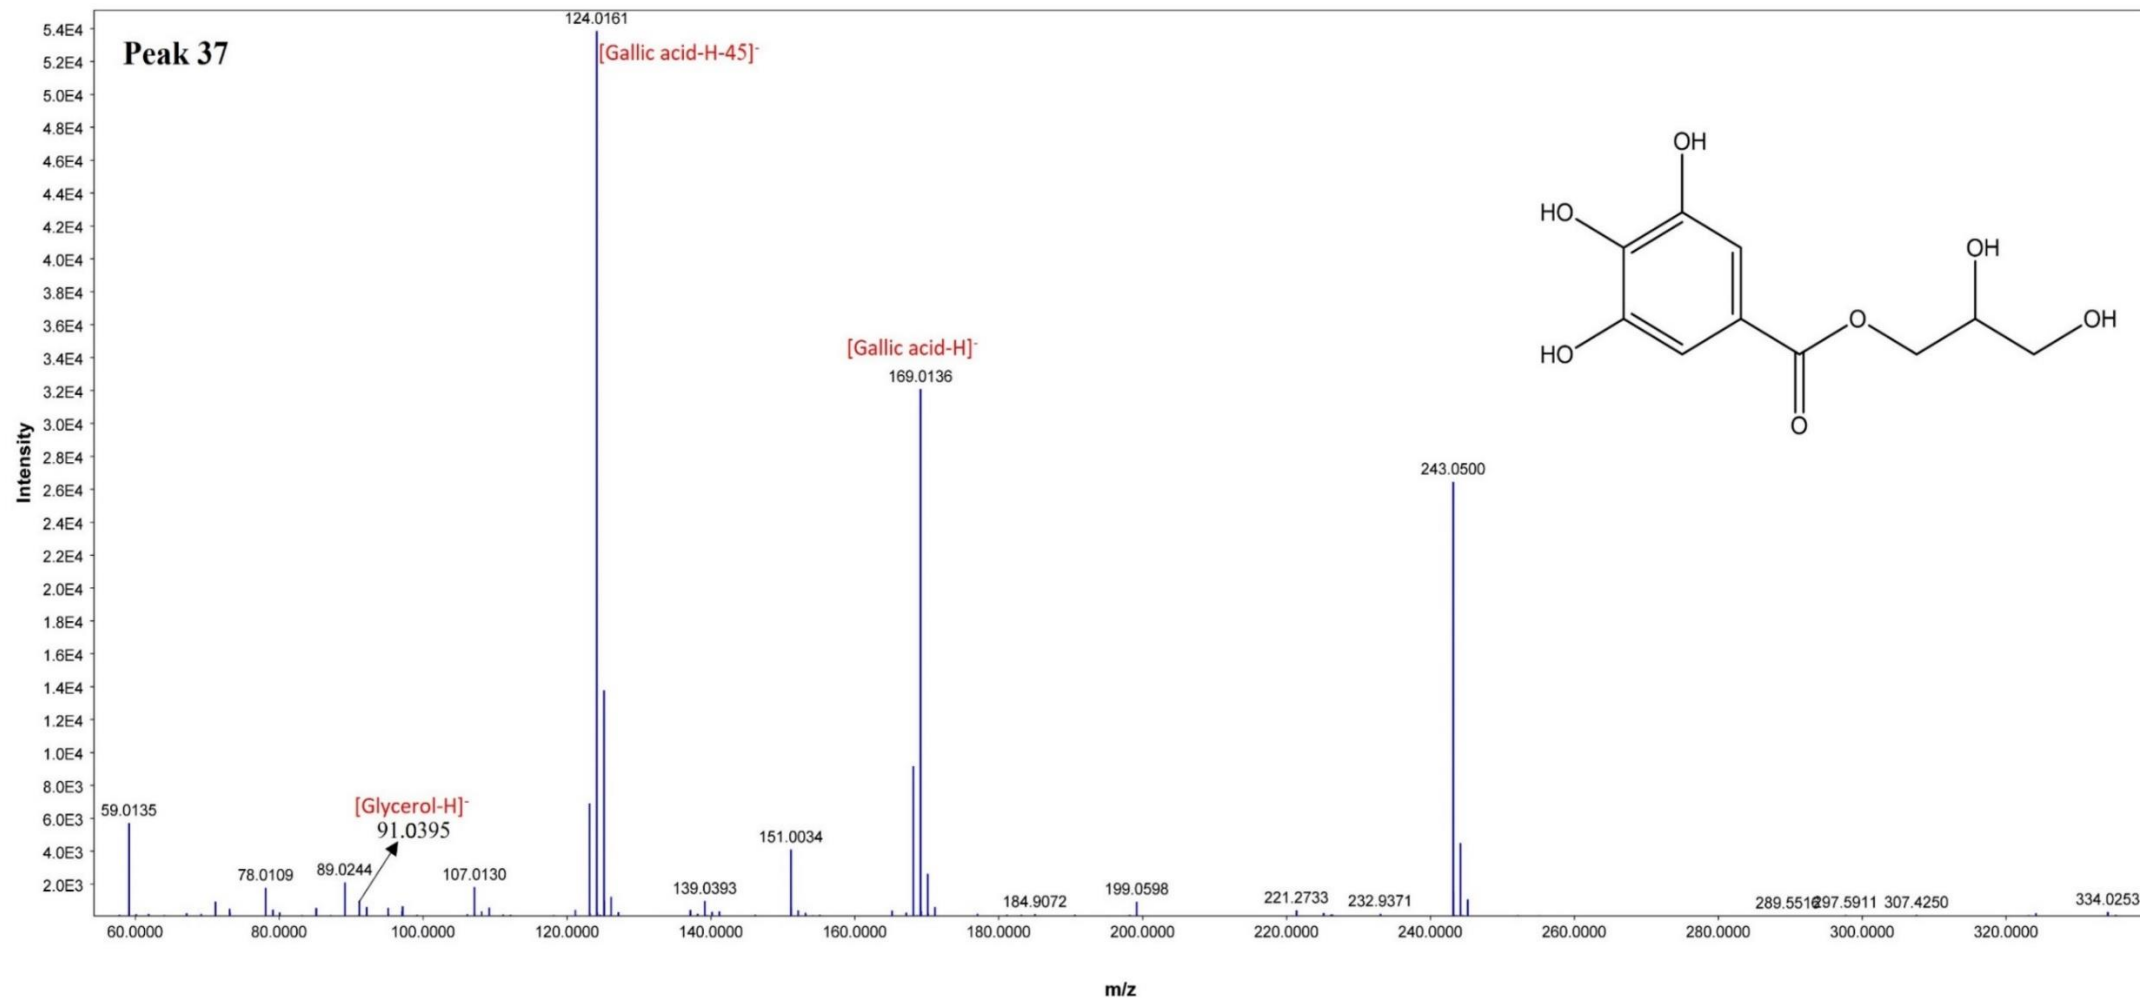

**Fig. S4.** MS/MS spectrum of galloylglycerol (37)

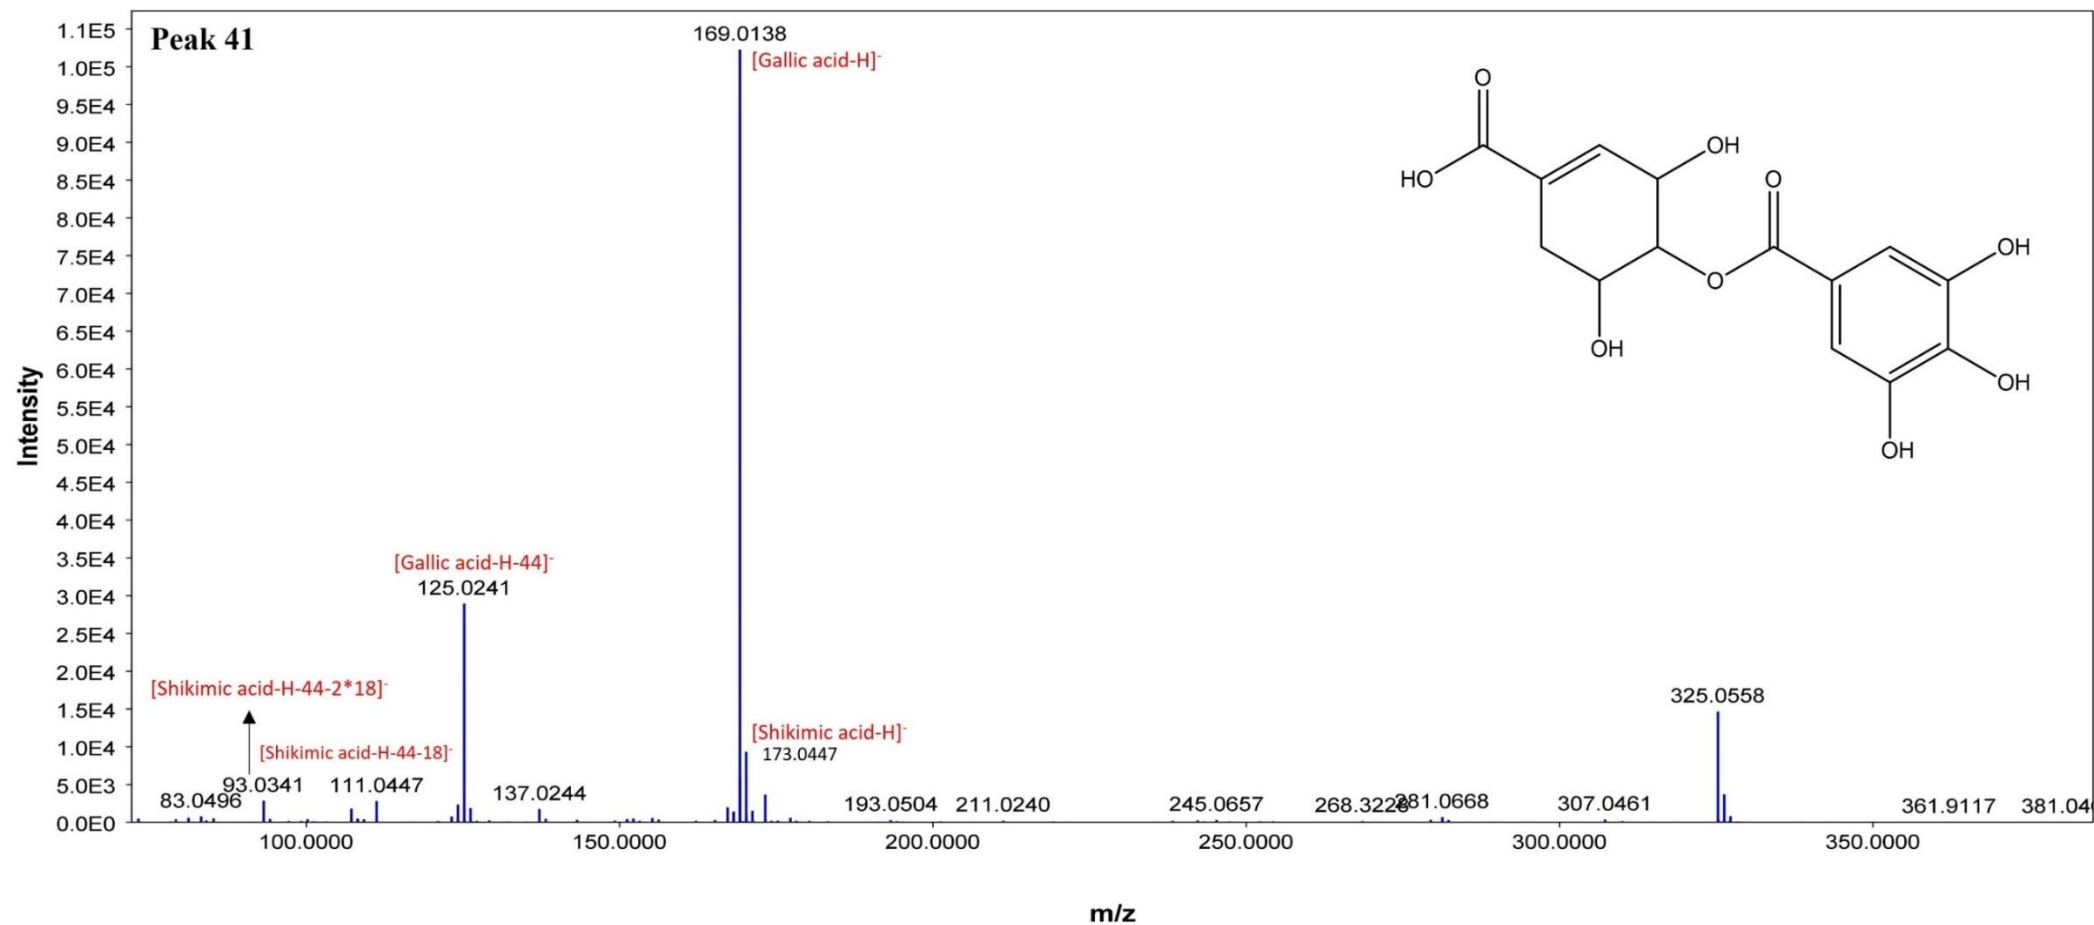

**Fig. S5.** MS/MS spectrum of galloylshikimic acid (**41**)

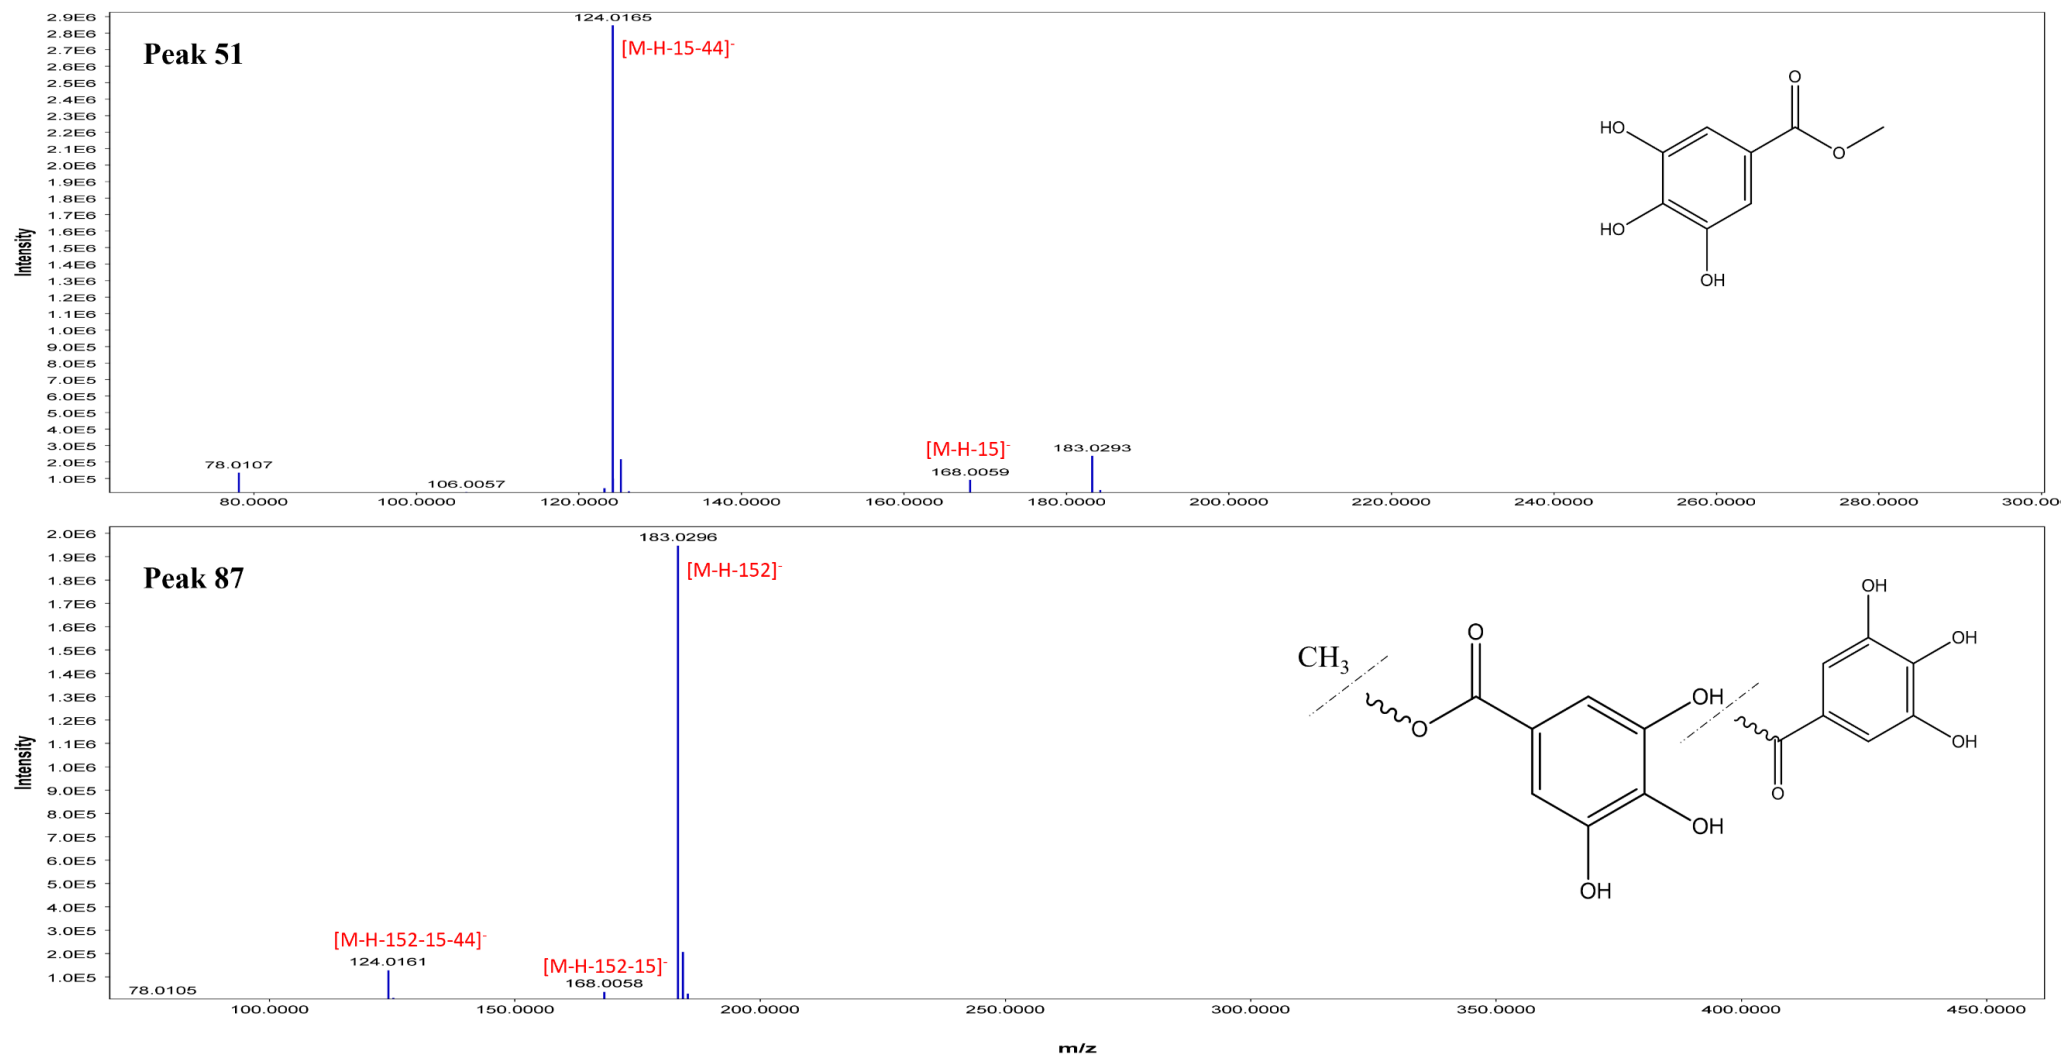

**Fig. S6.** MS/MS spectra of methyl gallate (**51**) and methyl digallate (**87**)

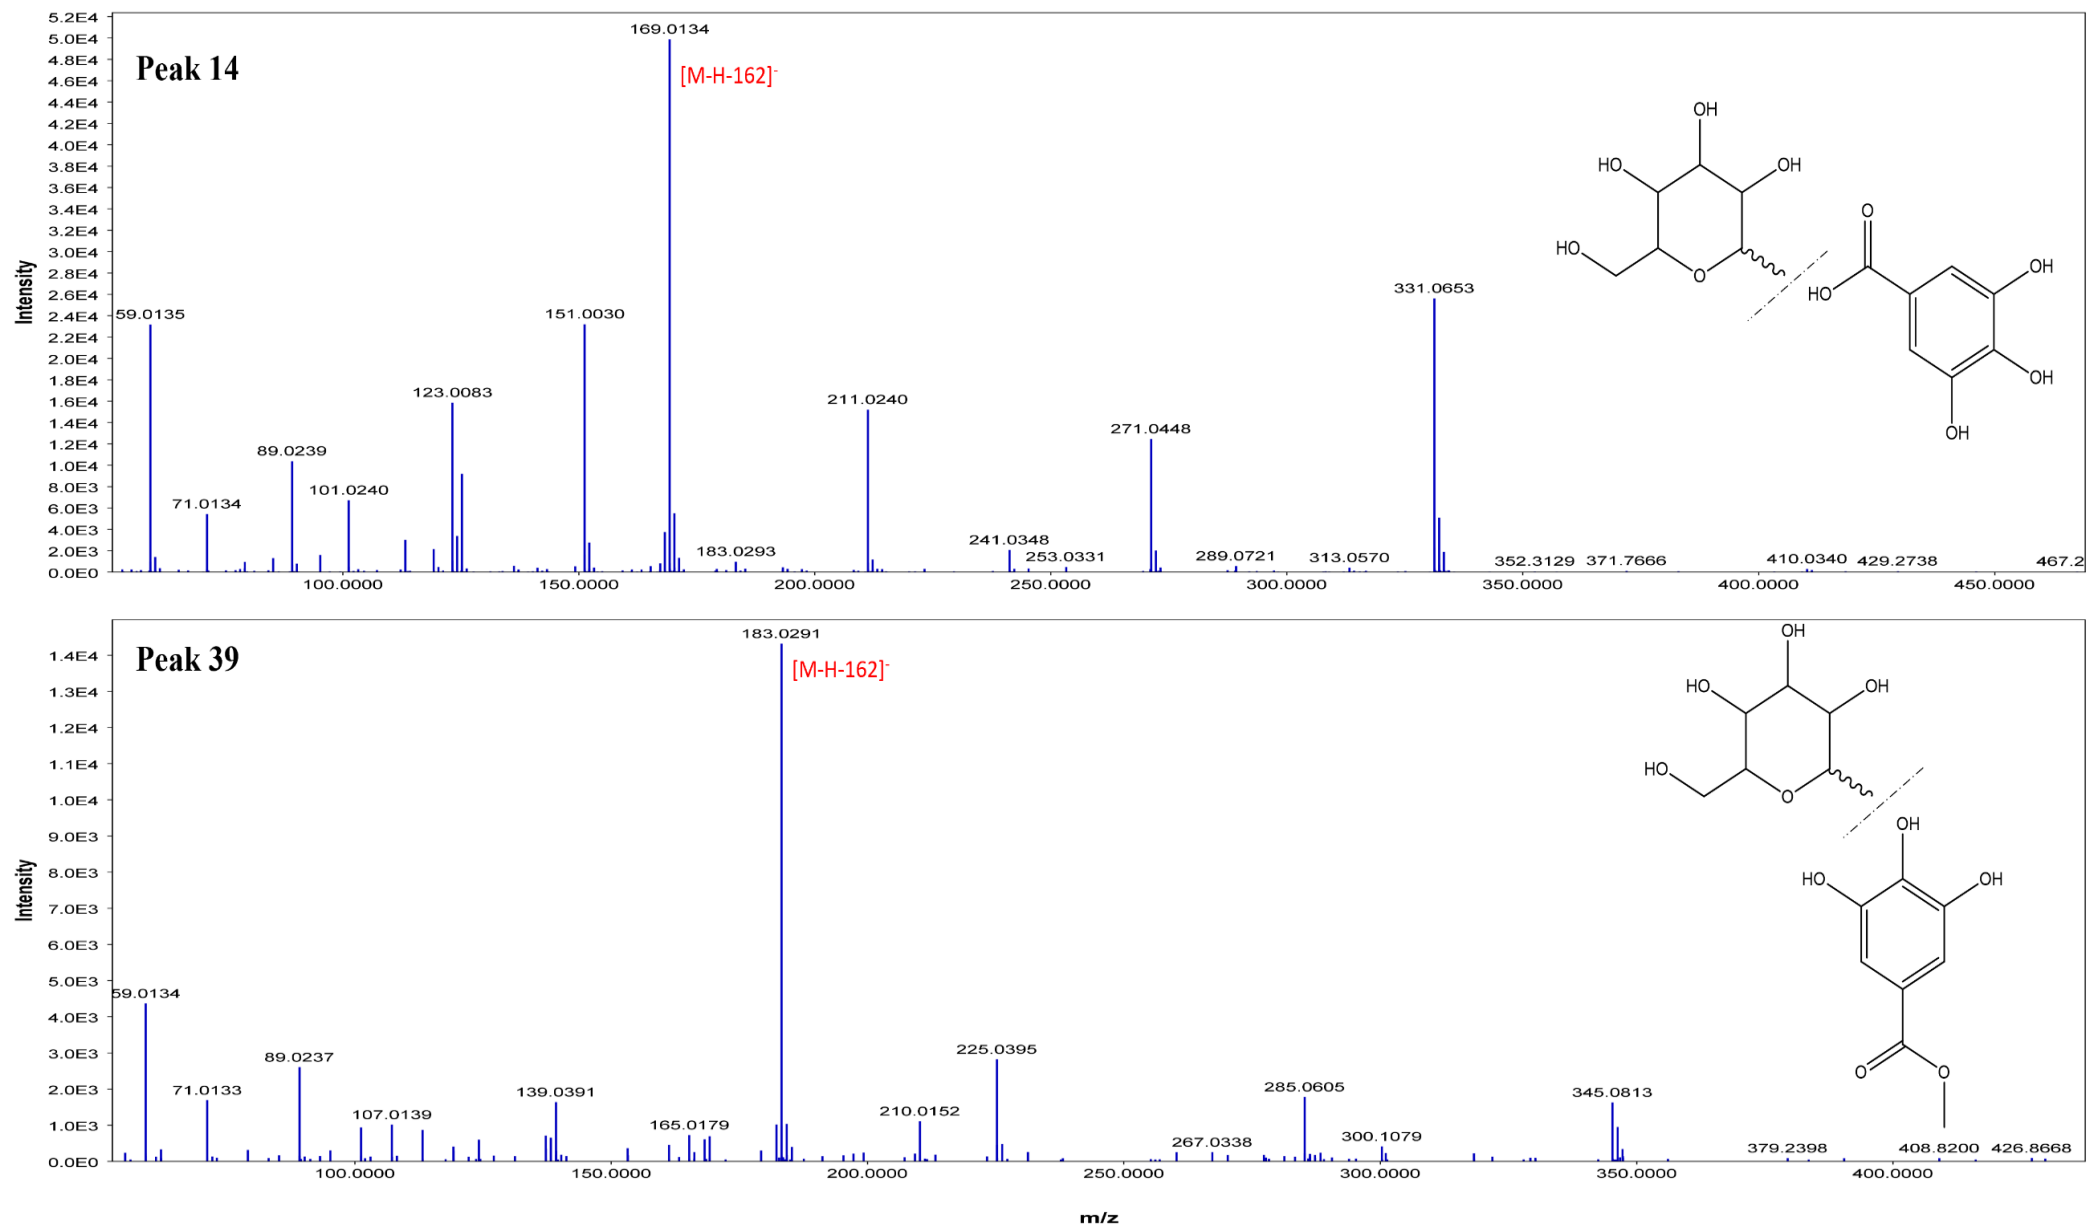

**Fig. S7.** MS/MS spectra of galloyl hexoside (**14**) and methyl gallate hexoside (**39**)



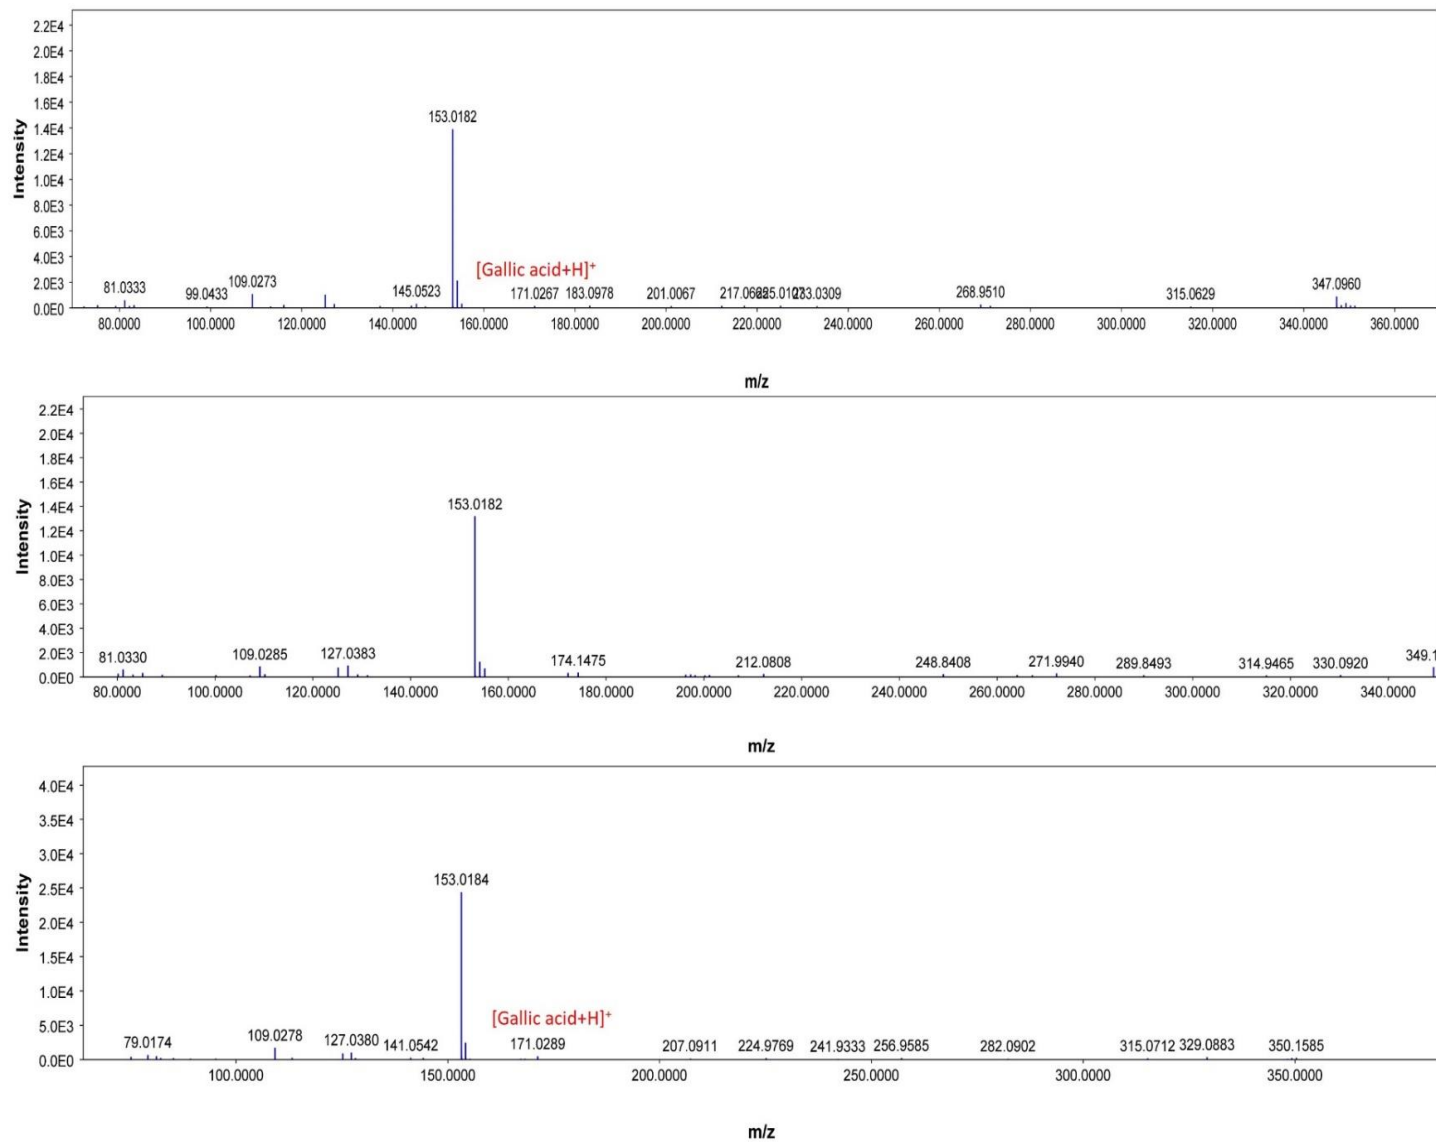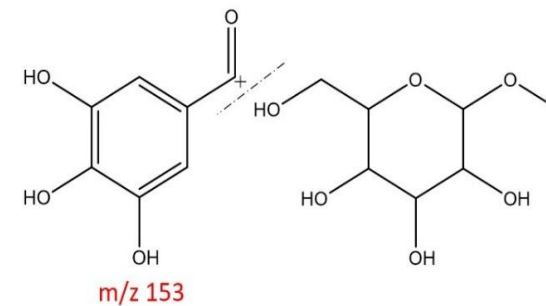

**Fig. S8.** MS/MS spectra of methyl-O-galloyl hexoside isomers (8, 23, 31)

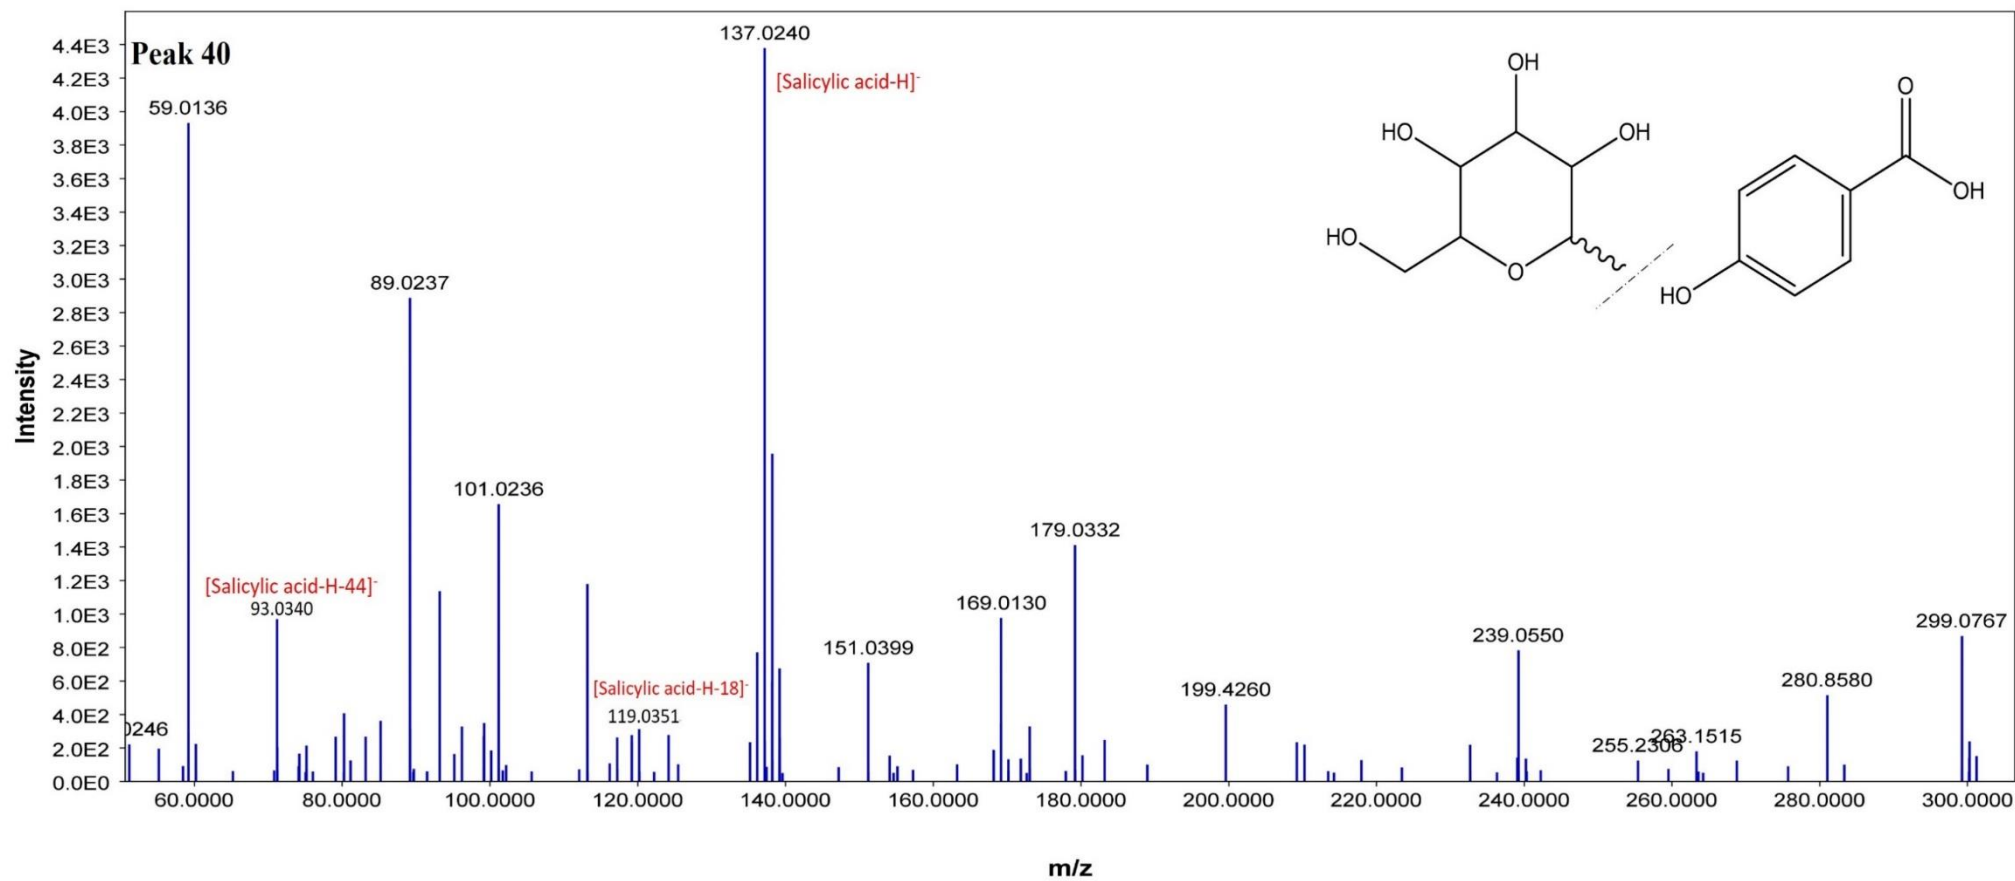

**Fig. S9.** MS/MS spectrum of salicylic acid hexoside (**40**)

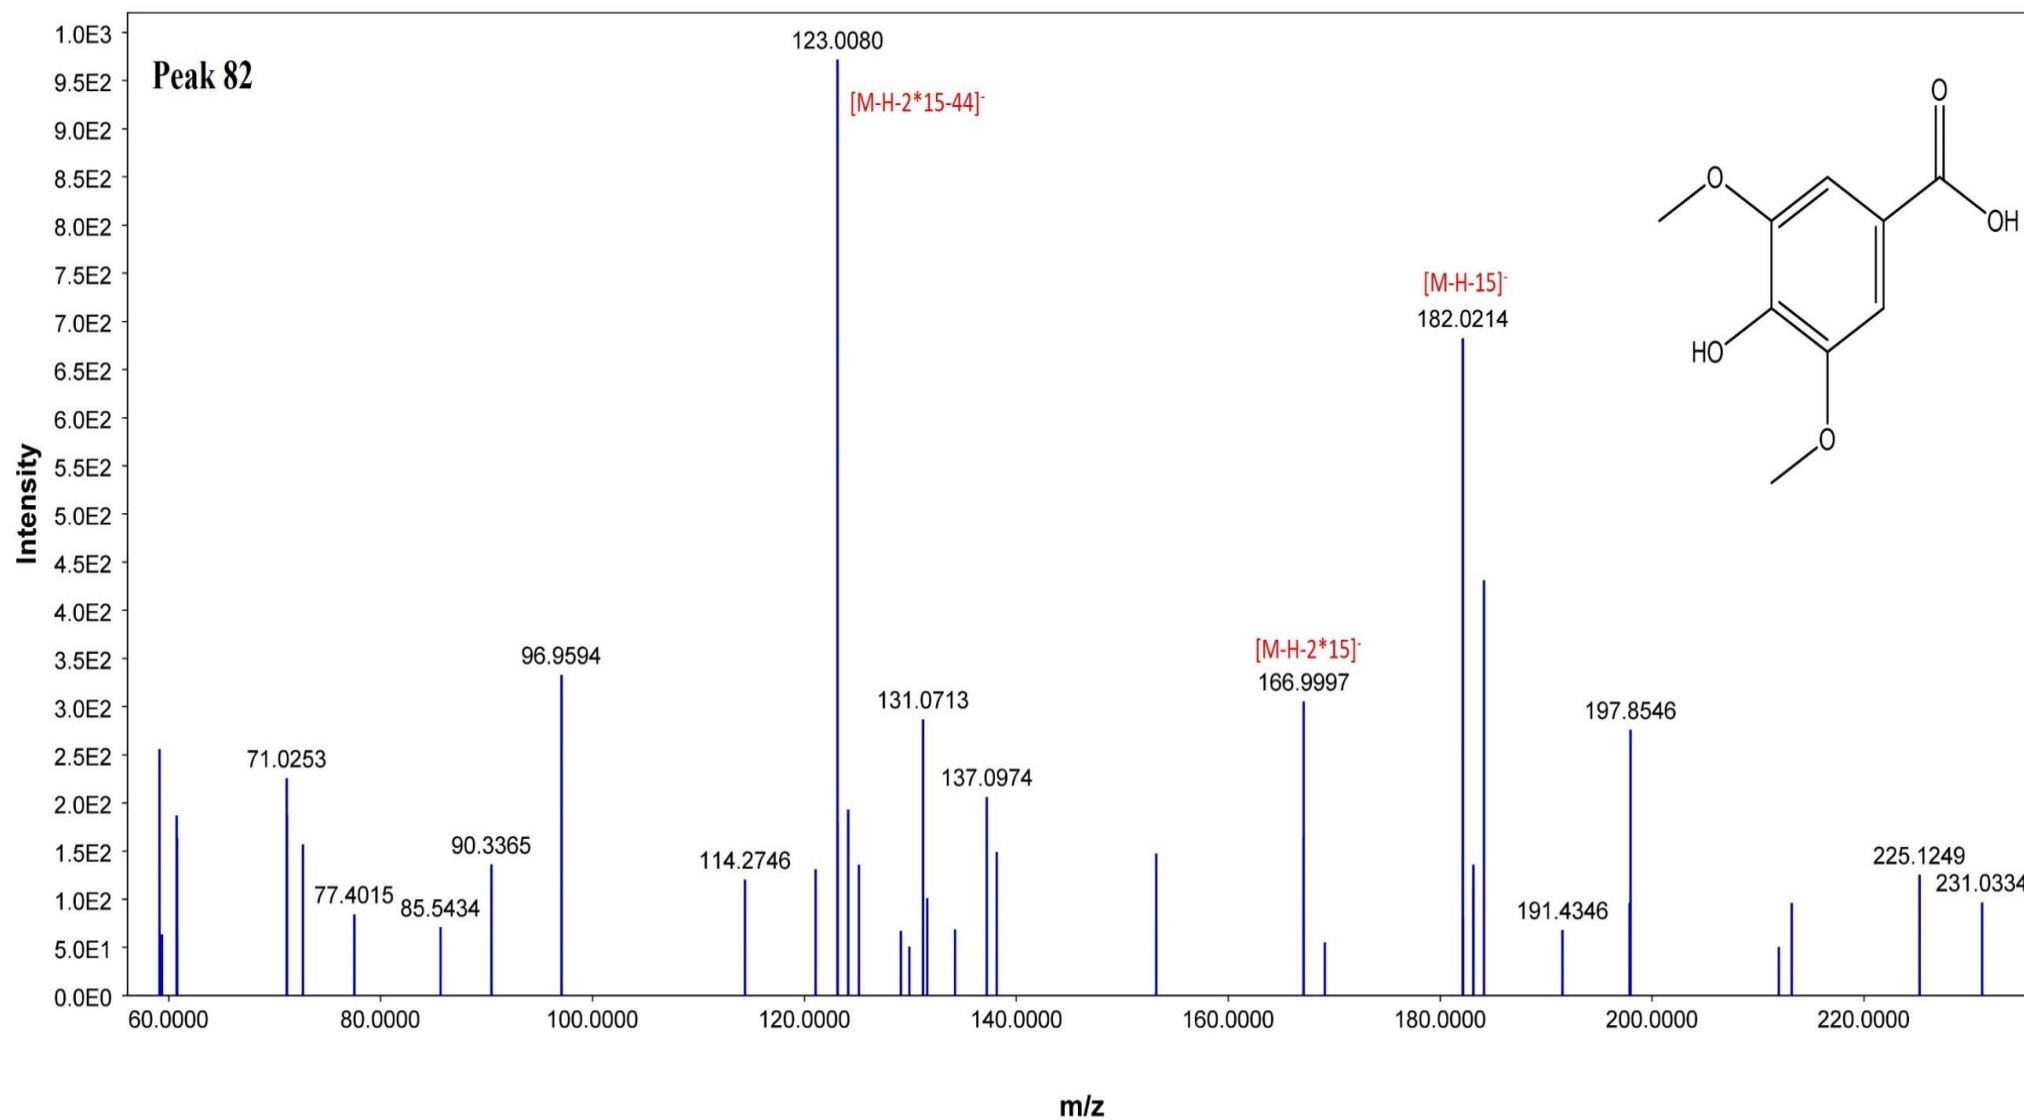

**Fig. S10.** MS/MS spectrum of syringic acid (**82**)

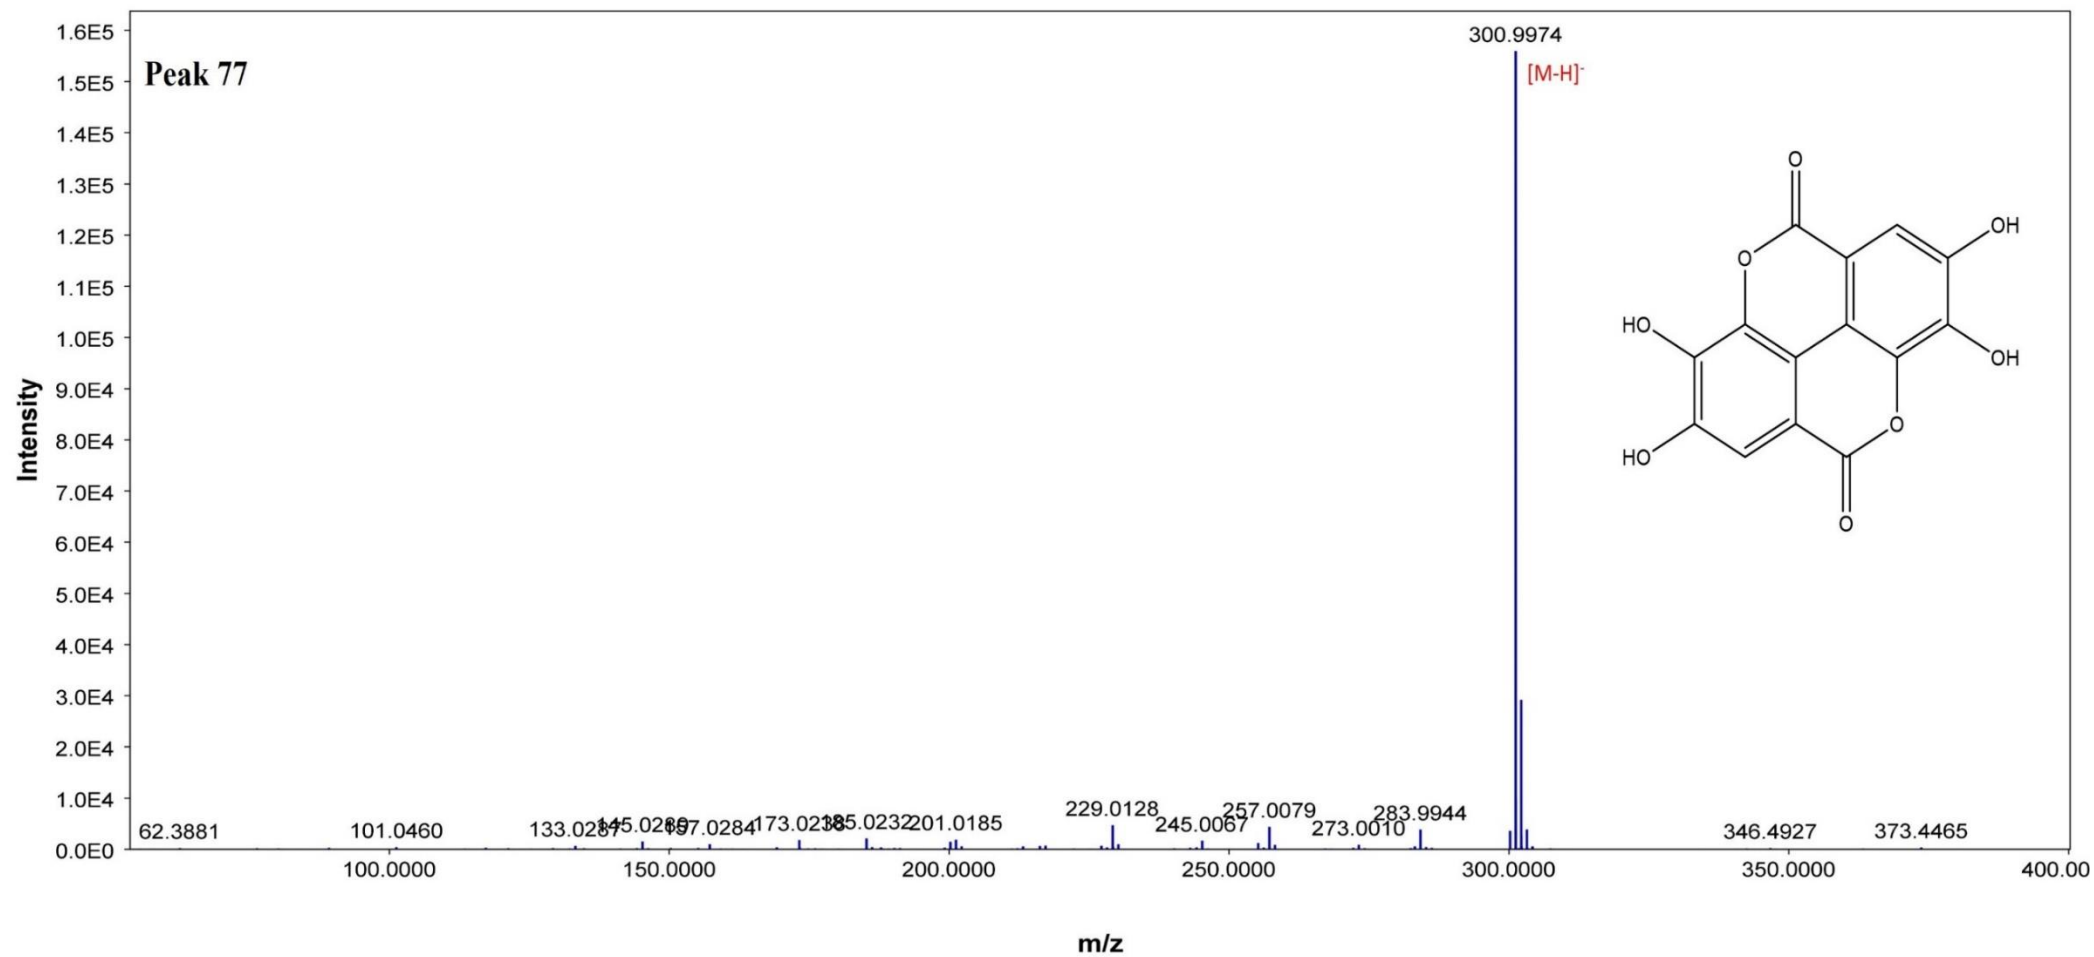

**Fig. S11.** MS/MS spectrum of ellagic acid (77)

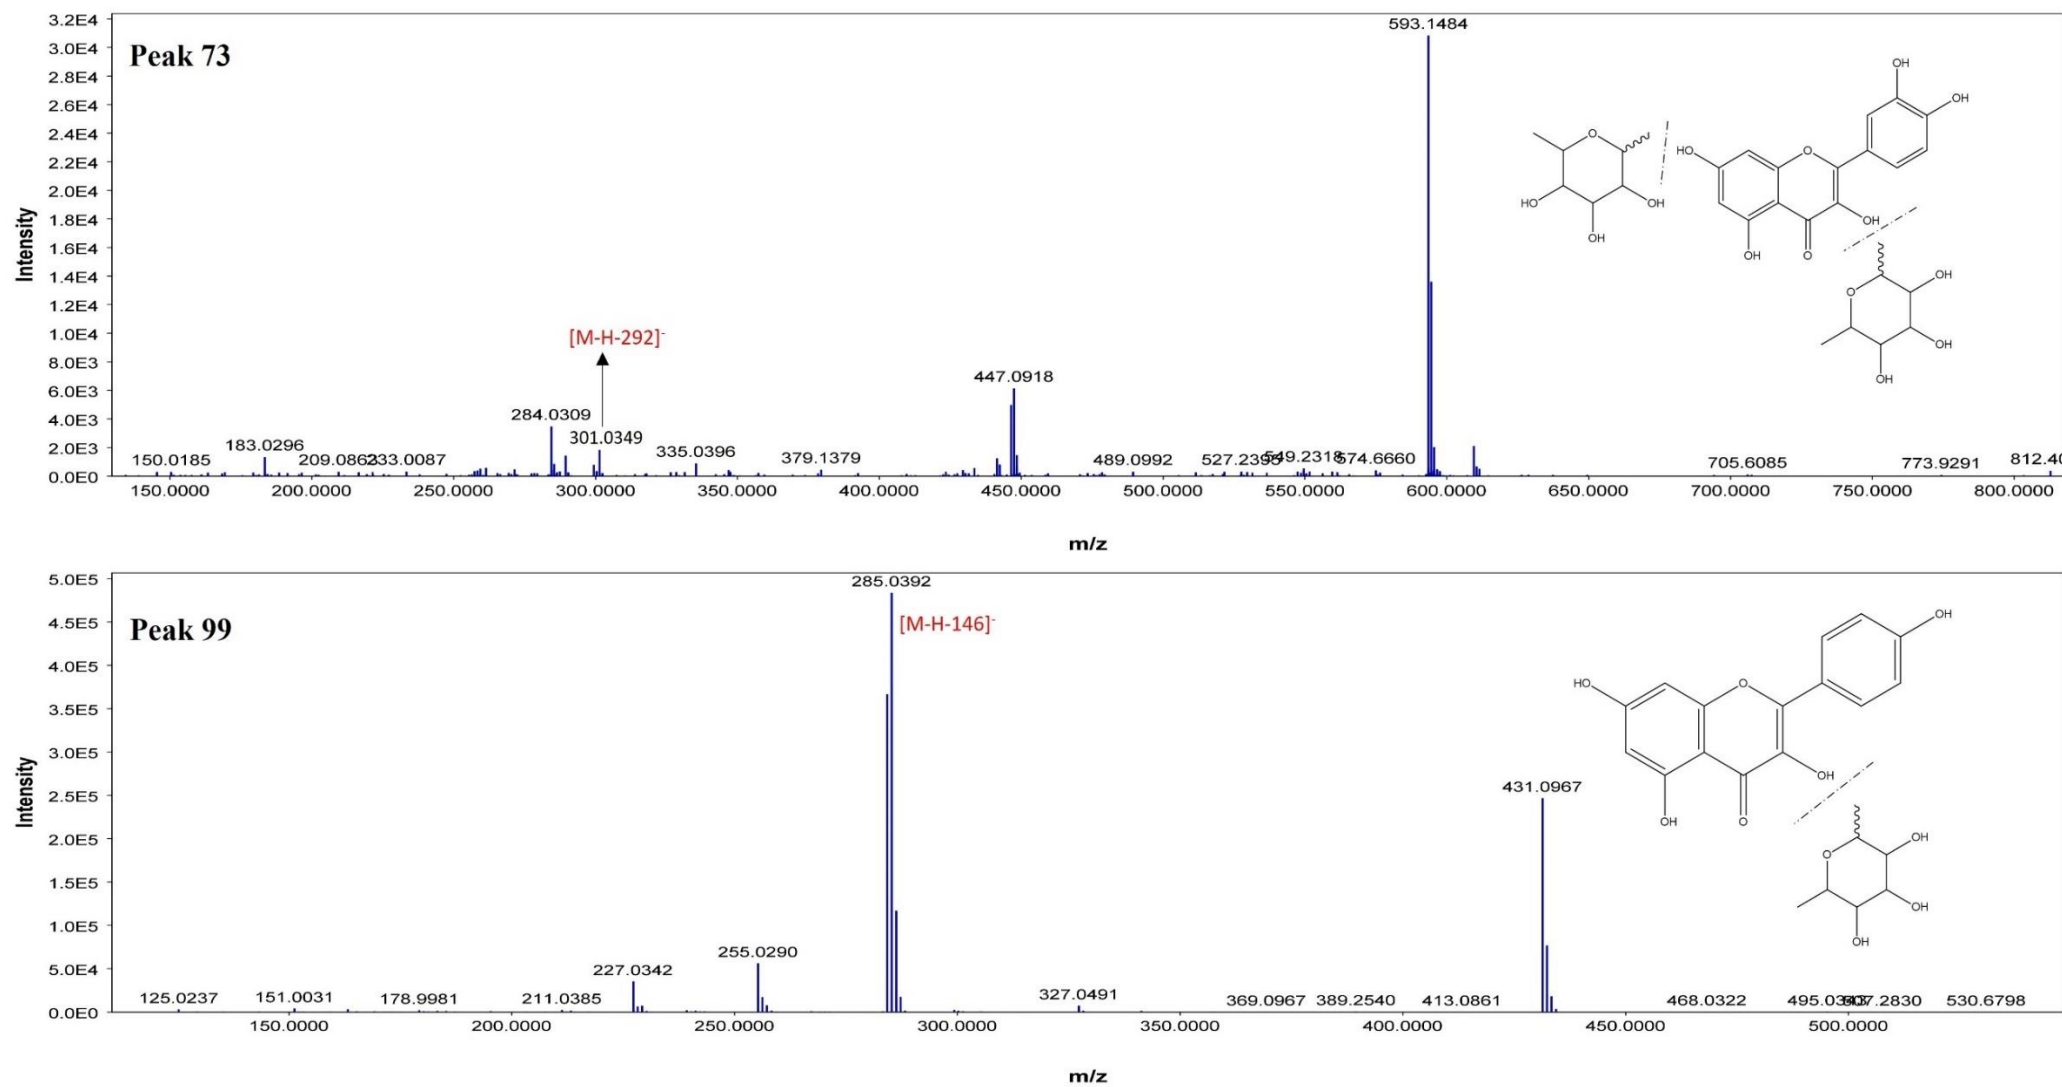

**Fig. S12.** MS/MS spectra of quercetin di-deoxyhexoside (**73**) and kaempferol deoxyhexoside (**99**)

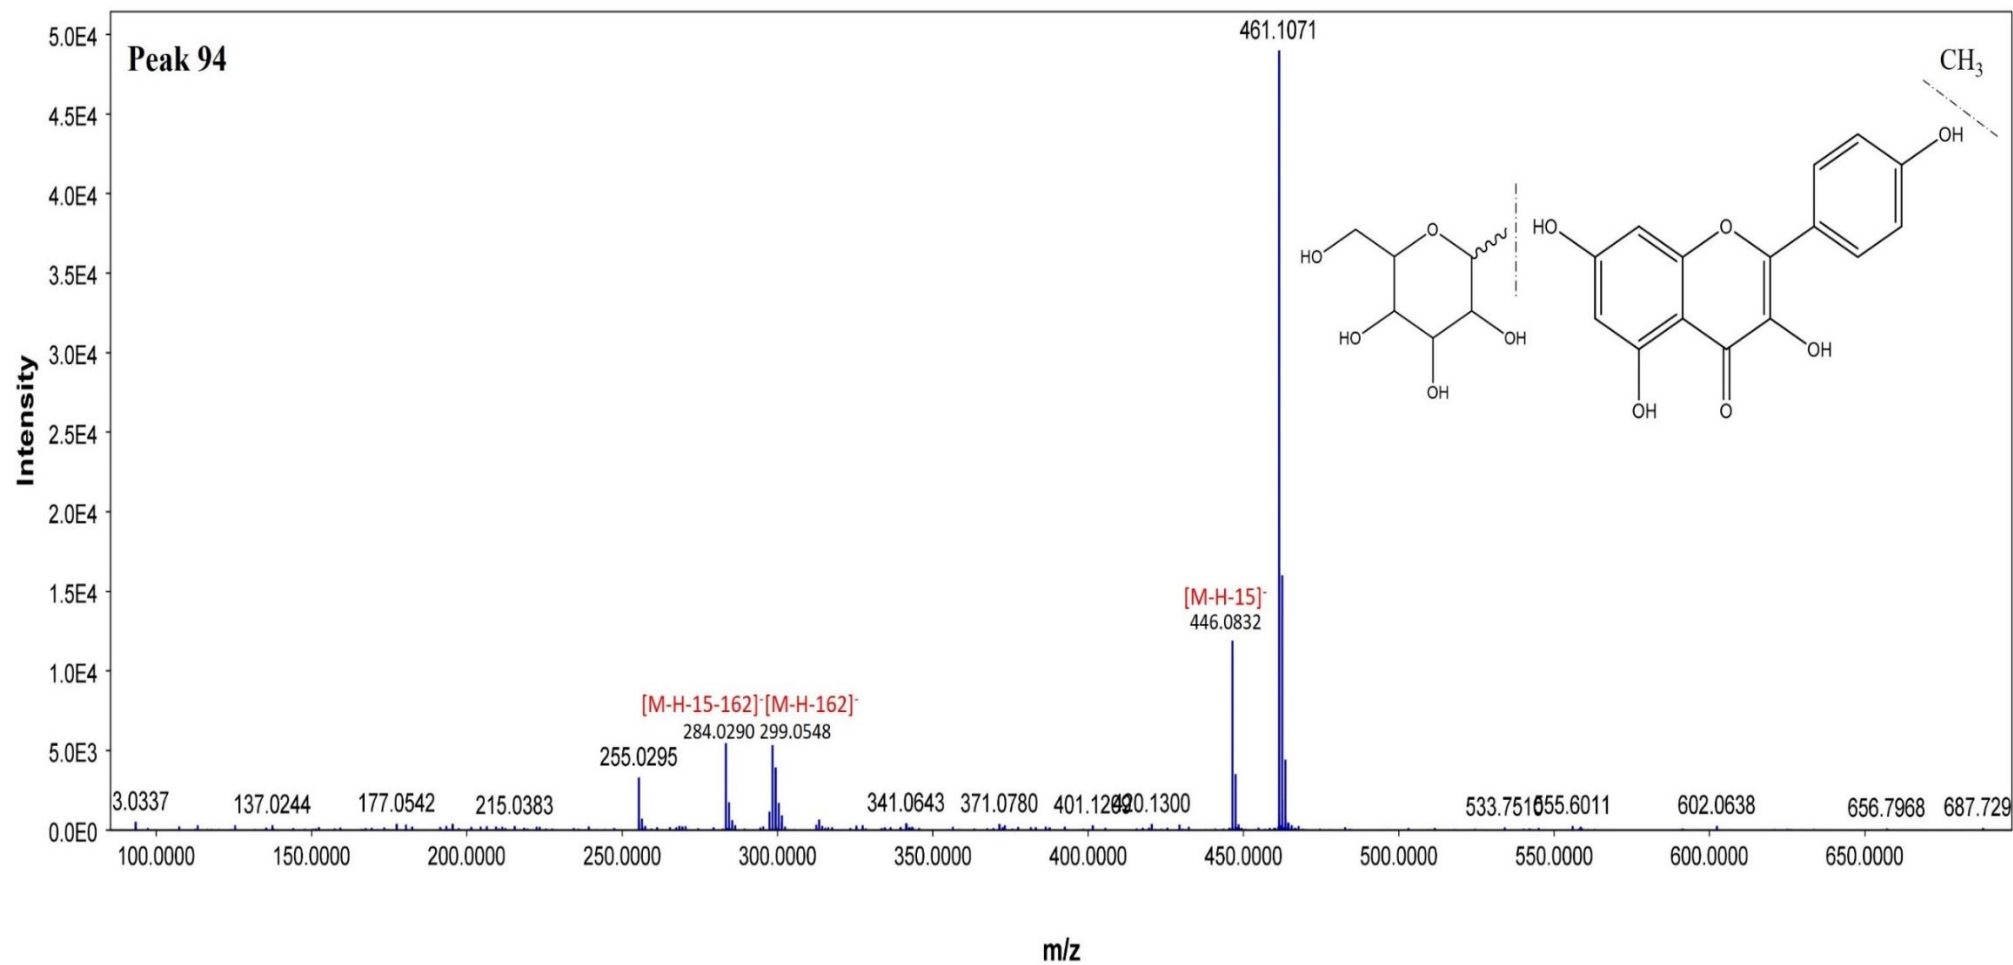

**Fig. S13.** MS/MS spectrum of kaempferide hexoside (**94**)

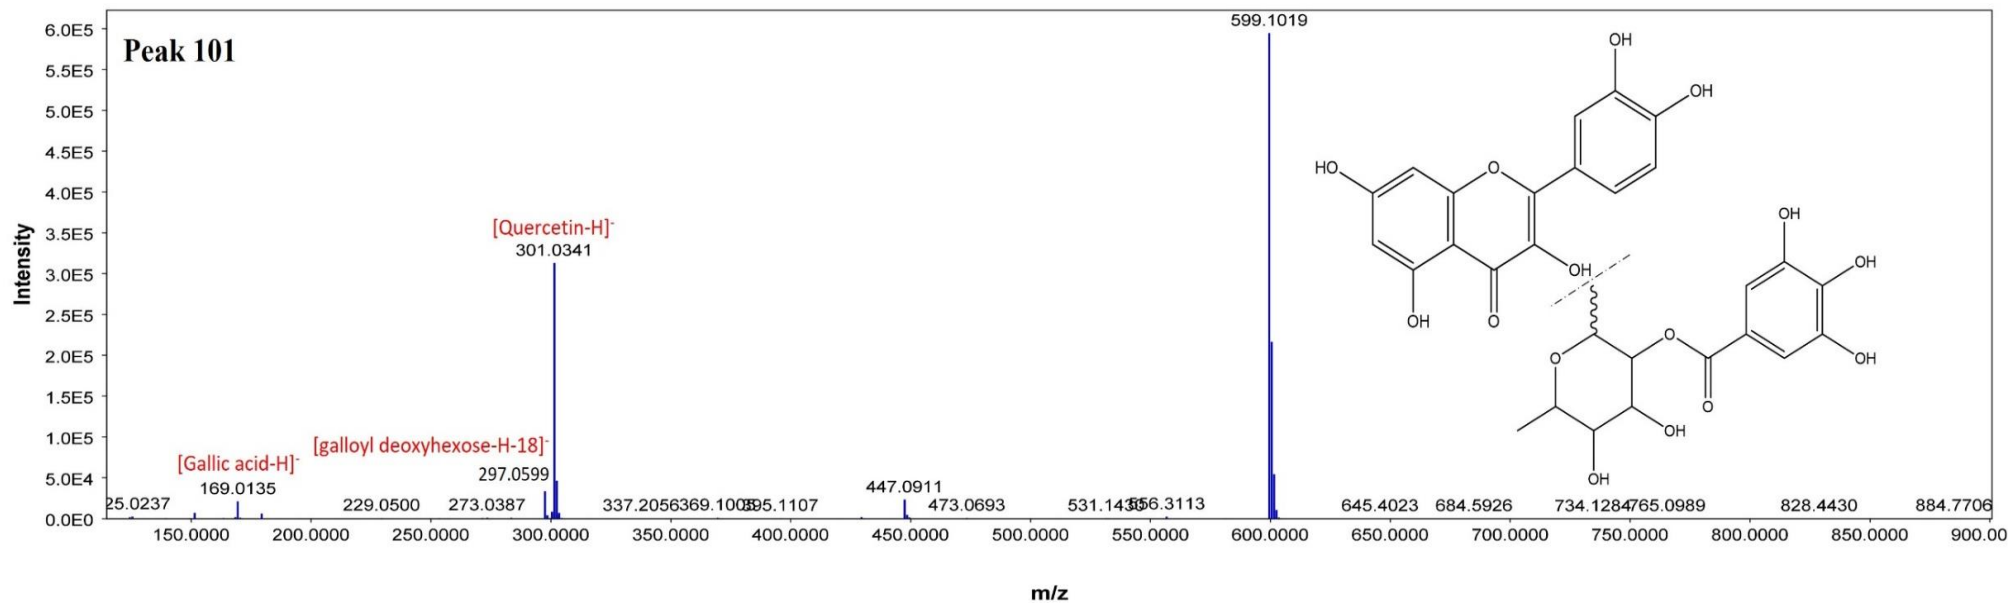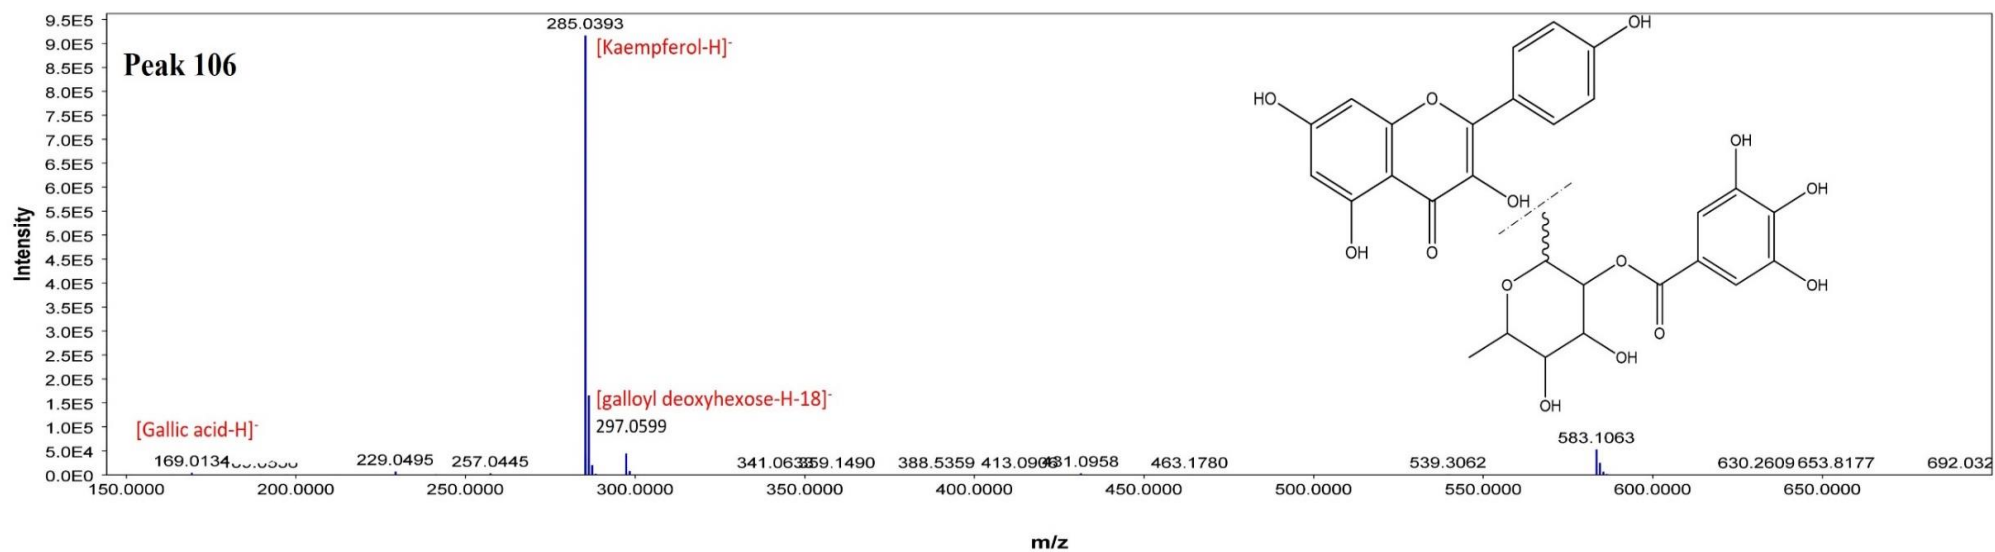

**Fig. S14.** MS/MS spectra of quercetin galloyl deoxyhexoside (**101**) and kaempferol galloyl deoxyhexoside (**106**)

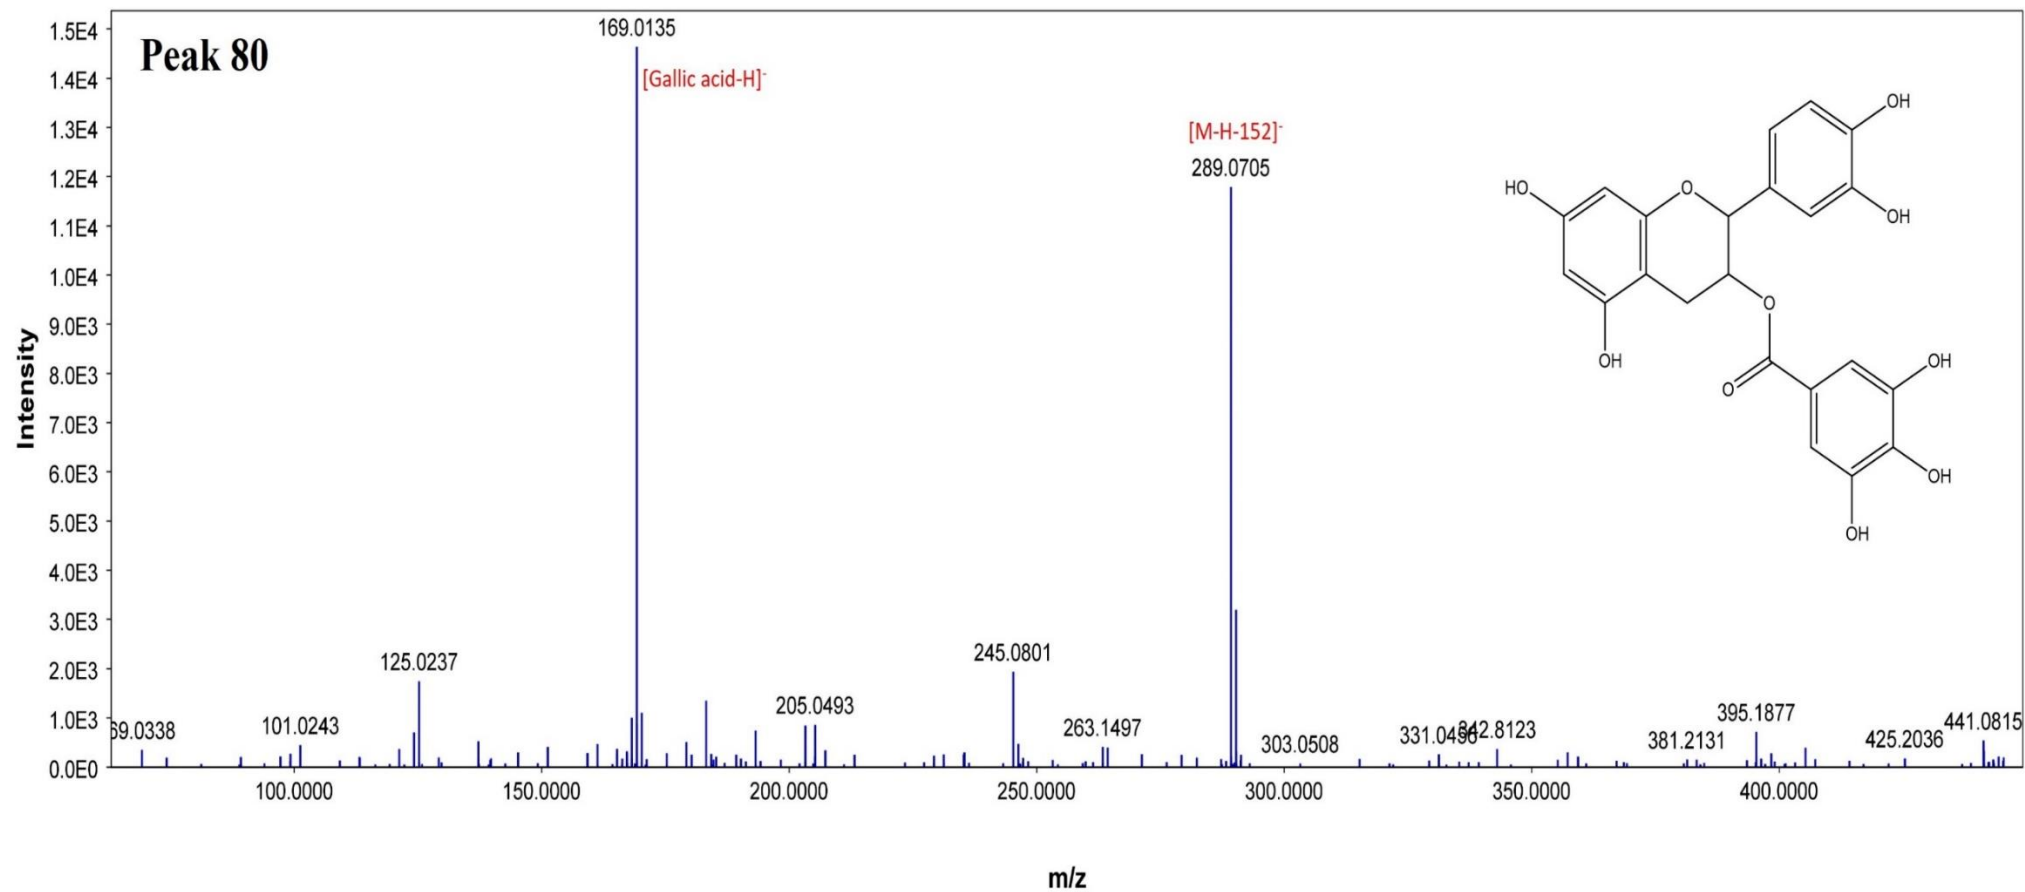

**Fig. S15.** MS/MS spectrum of catechin gallate (**80**)



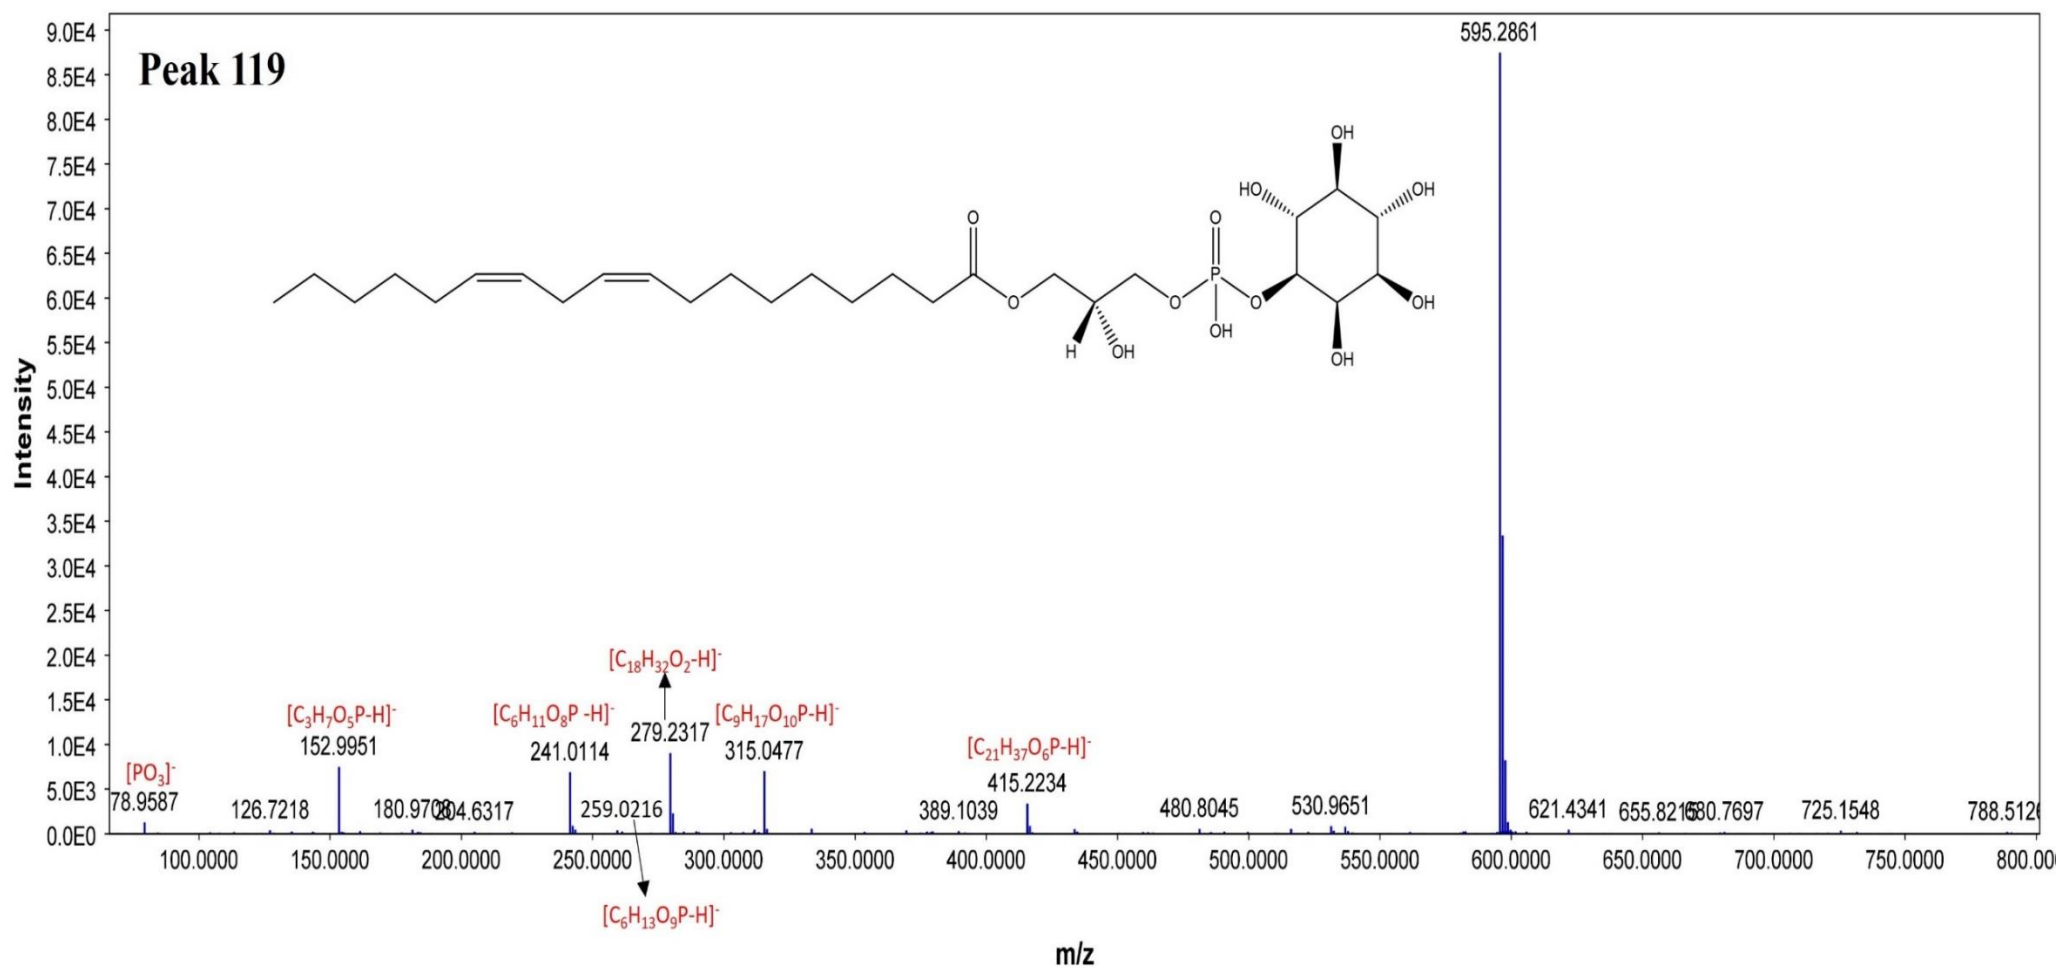

**Fig. S16.** MS/MS spectrum of phosphoinositol (18:2/0:0) (**119**)

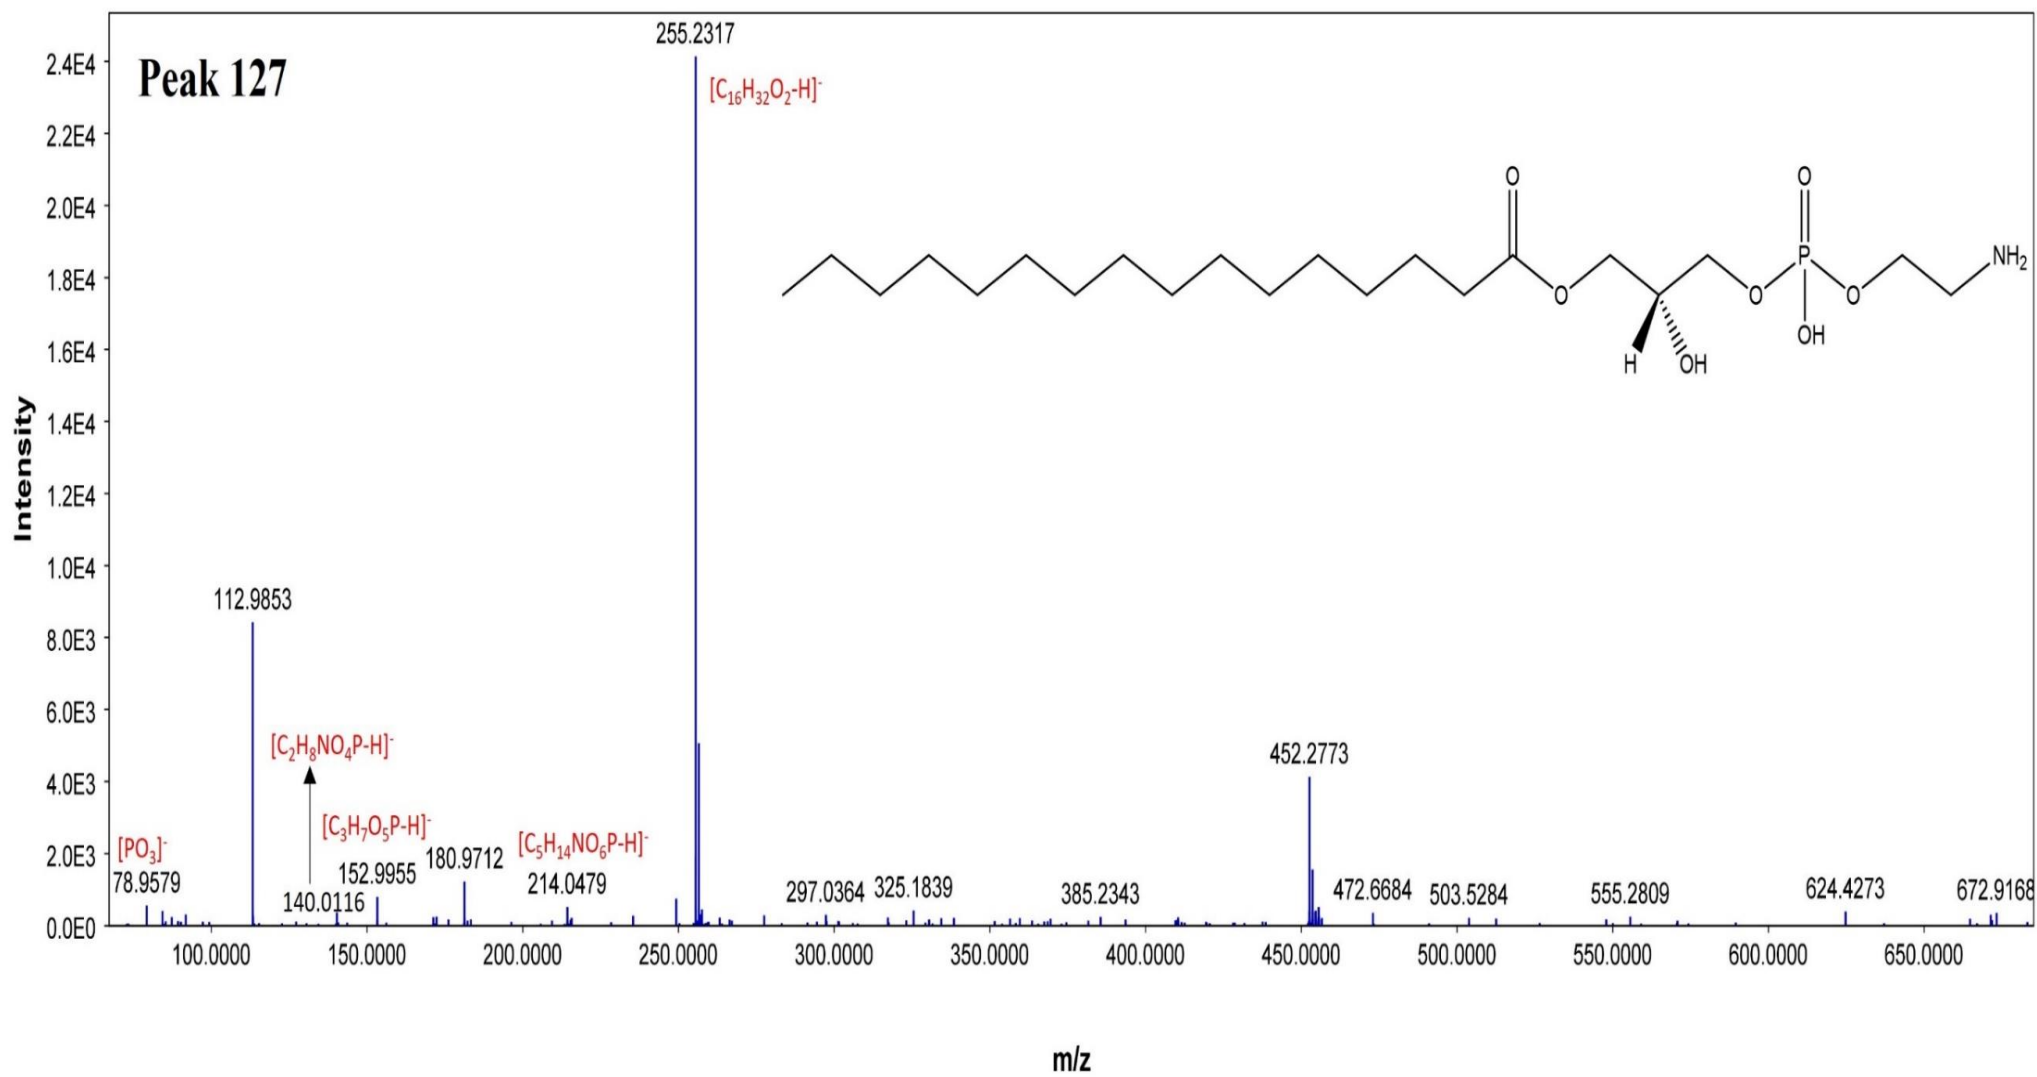

**Fig. S17.** MS/MS spectrum of phosphoethanolamine (16:0/0:0) (**127**)

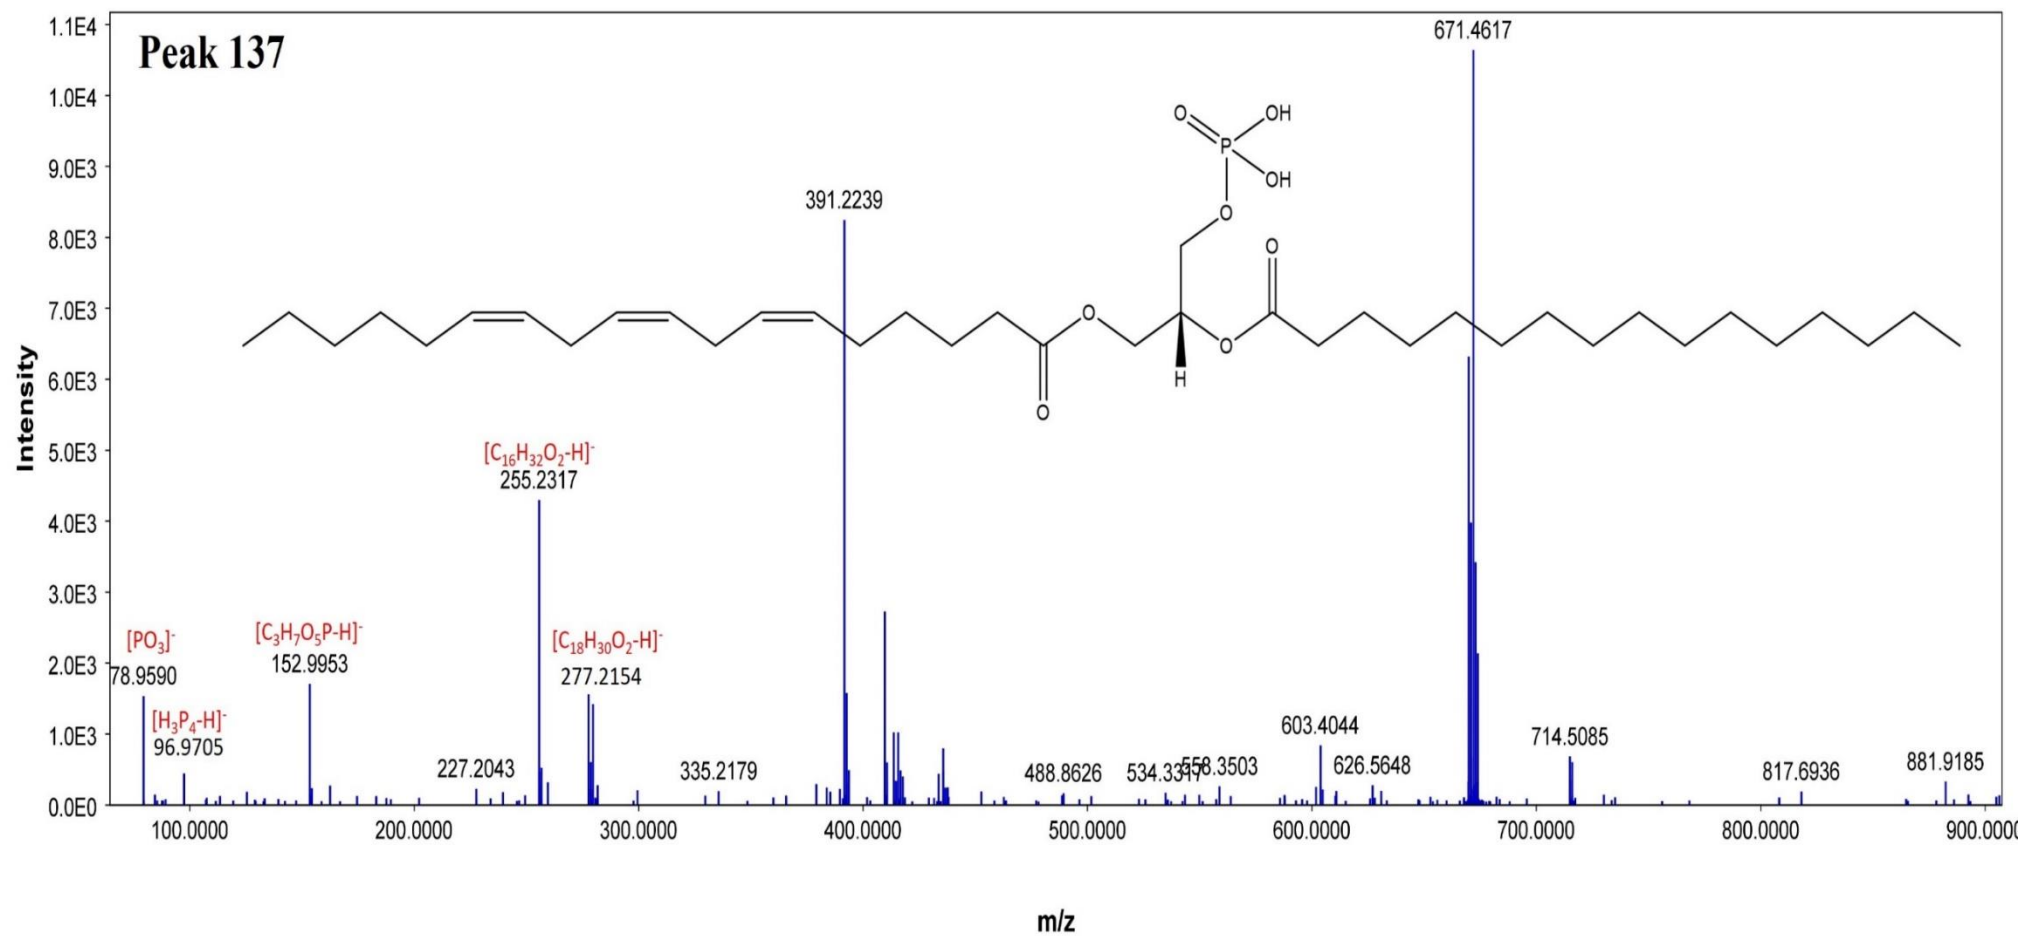

**Fig. S18.** MS/MS spectrum of phosphatidic acid (18:3/16:0) (**137**)

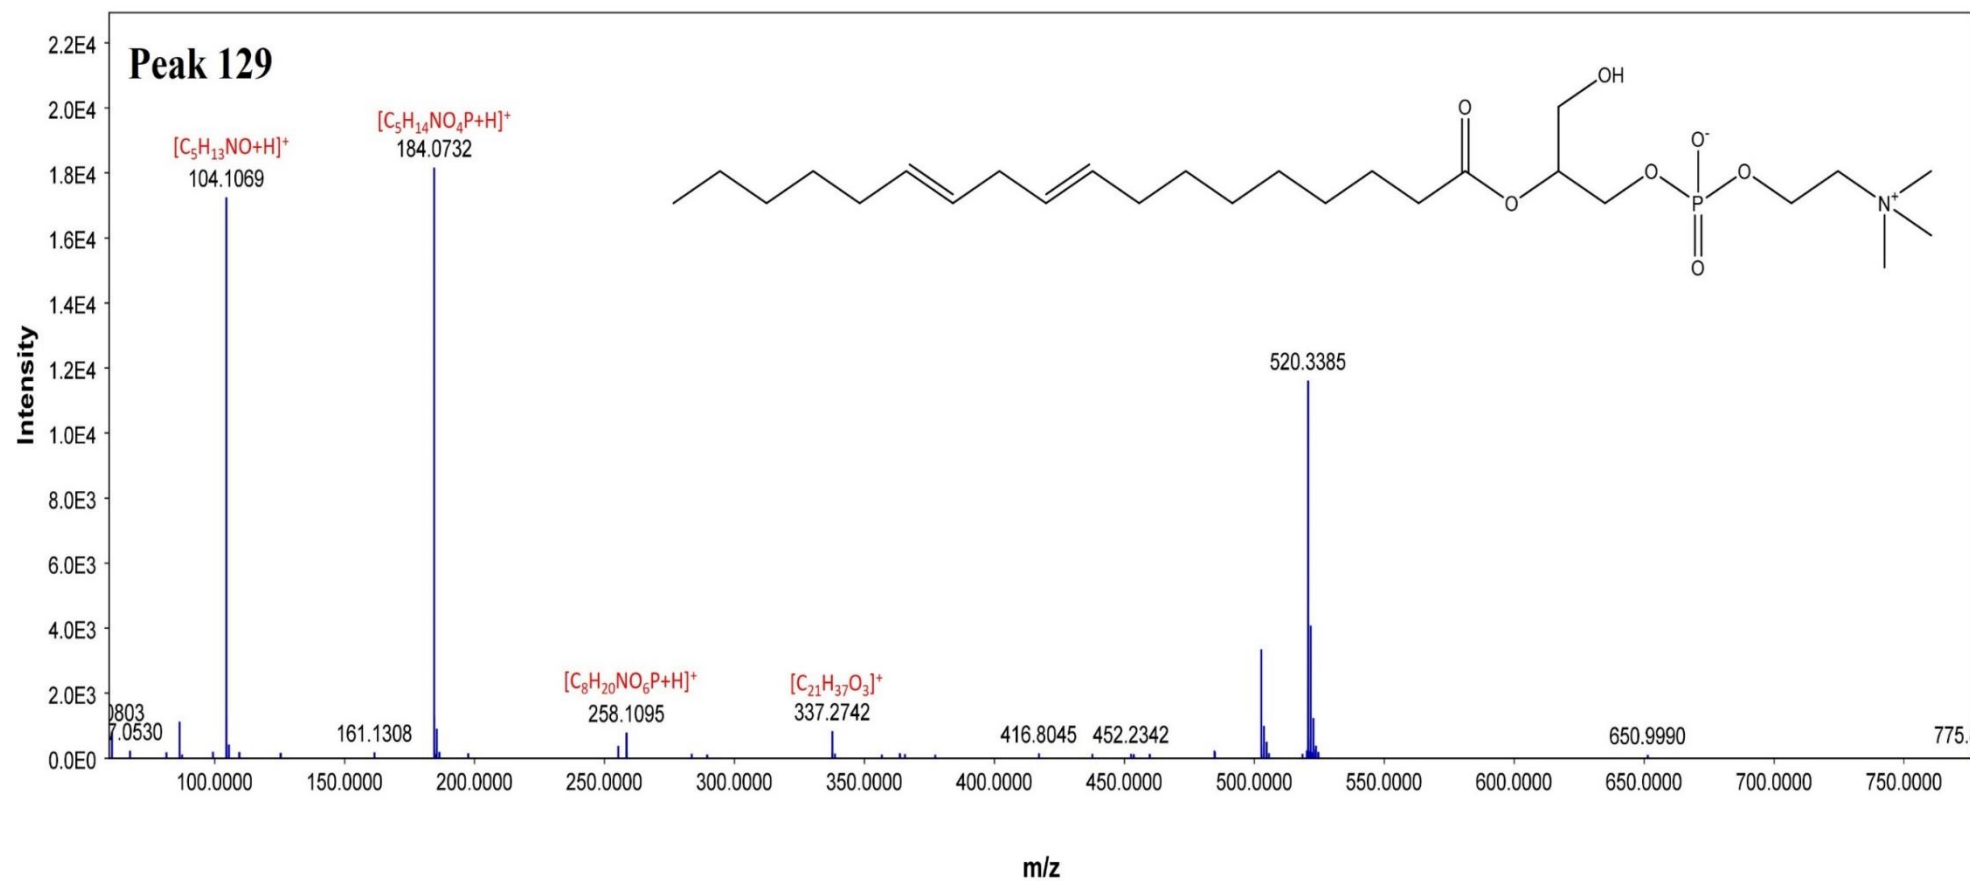

**Fig. S19.** MS/MS spectrum of phosphocholine (18:2) (**129**)

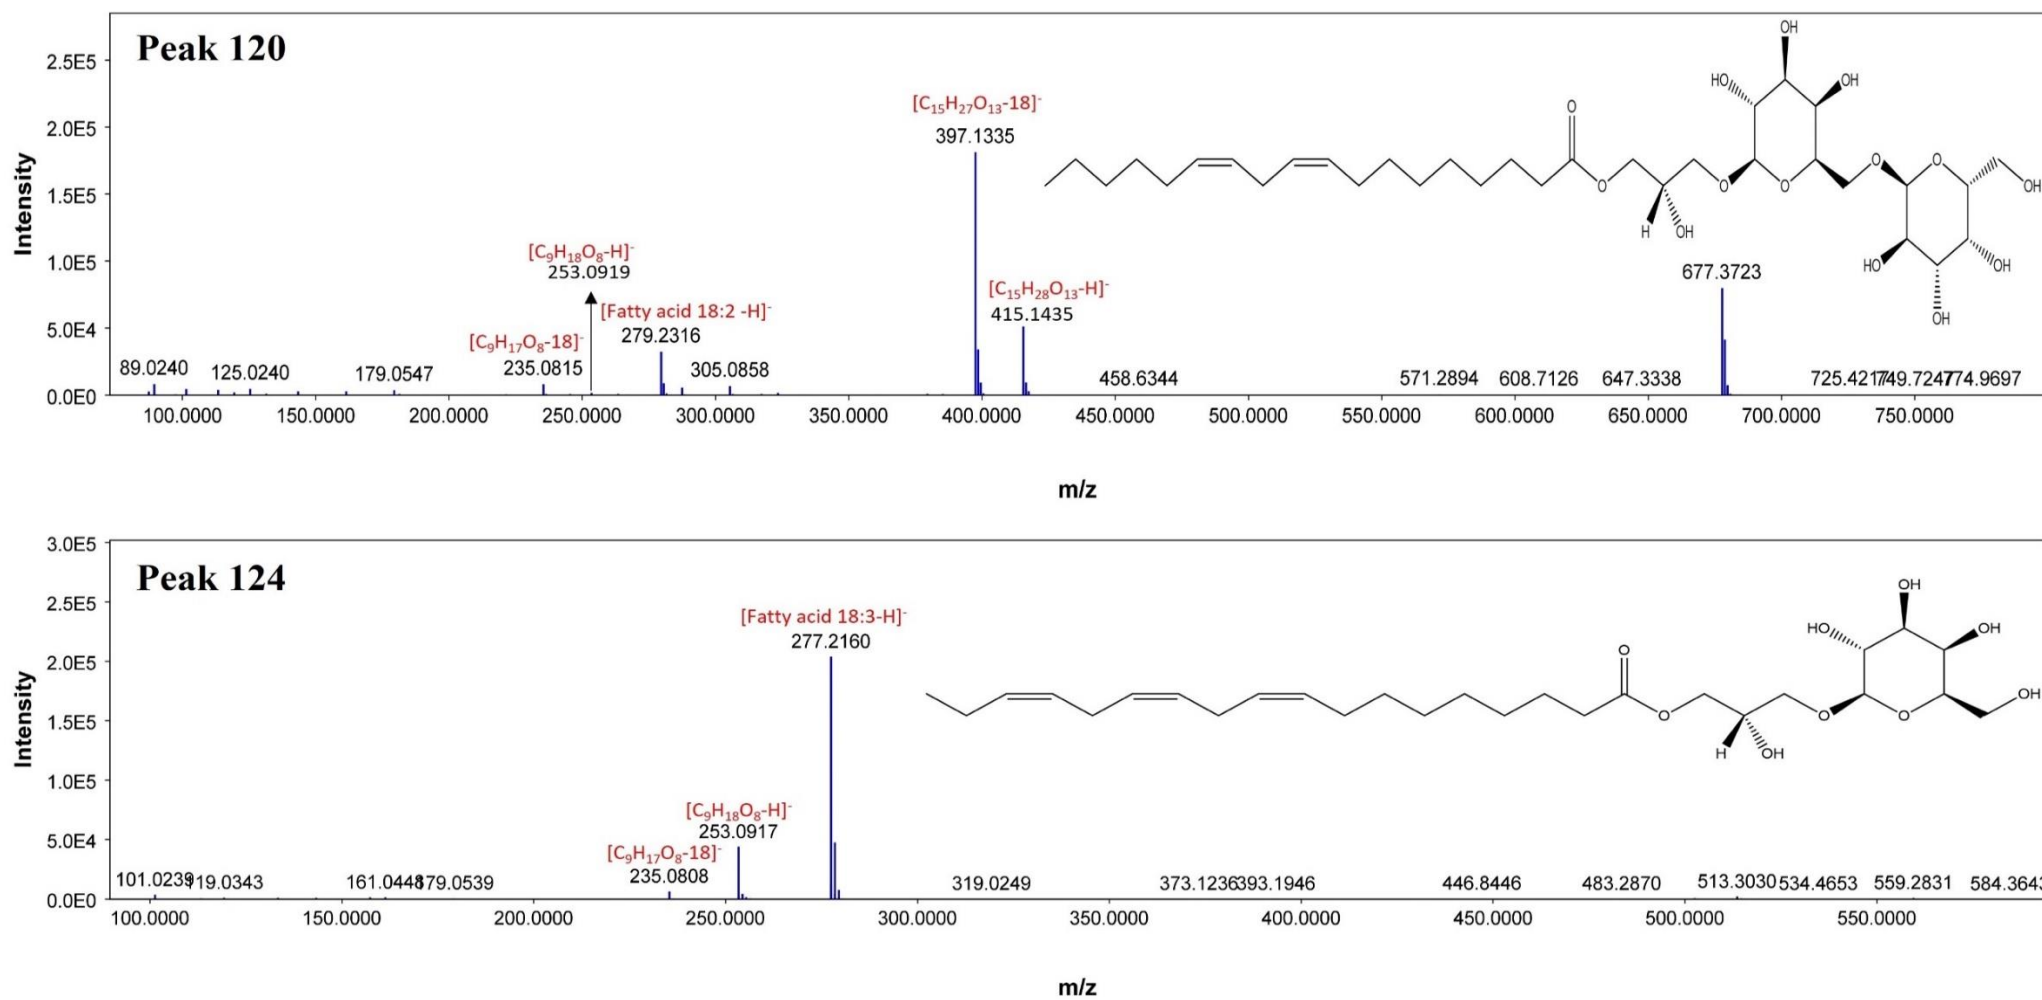

**Fig. S20.** MS/MS spectra of Digalactosylmonoacylglycerol (DGMG 18:2) (**120**), Monogalactosylmonoacylglycerol (MGMG 18:3) (**124**)

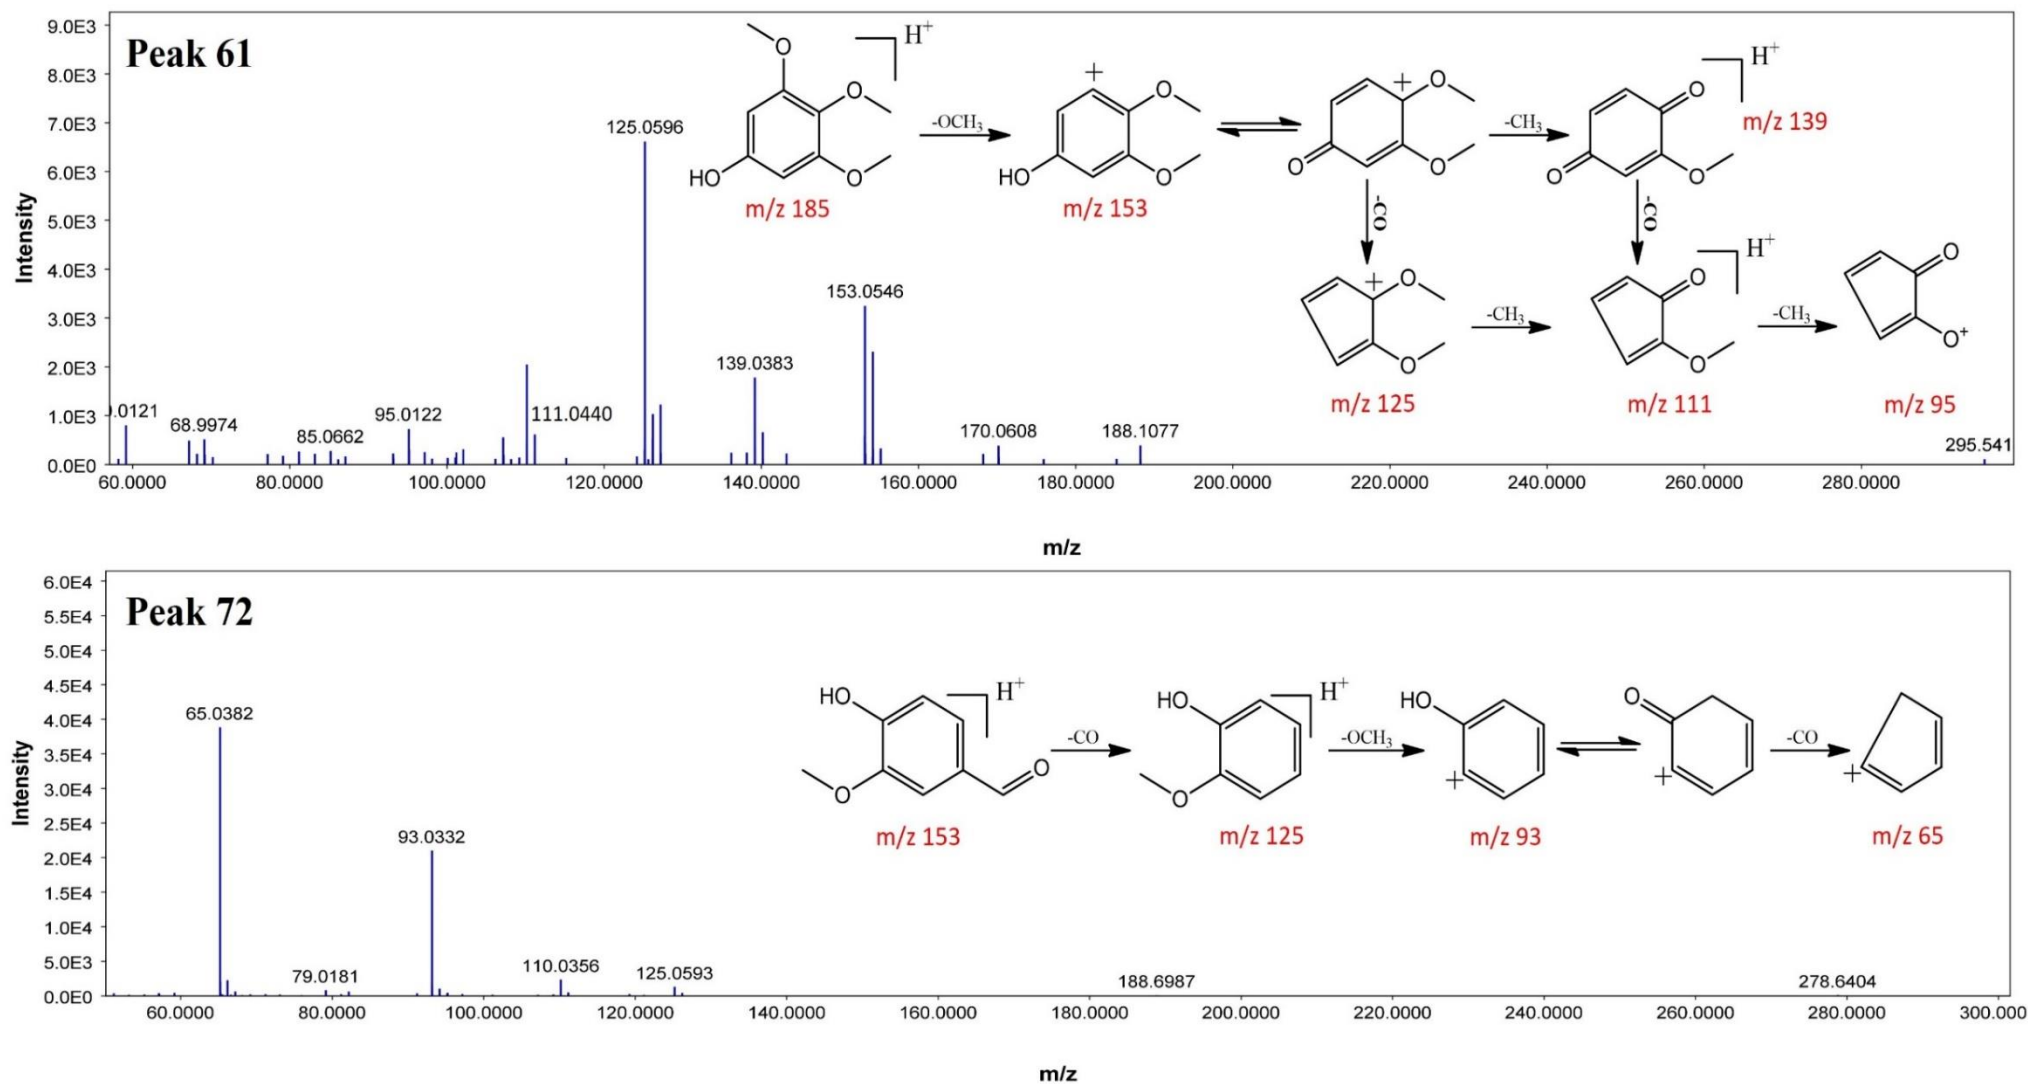

**Fig. S21.** MS/MS spectra of trimethoxyphenol (**61**), vaniline (**72**)
